# Supplementary material for: Structure and dynamic NMR behavior of rhodium complexes supported by Lewis acidic group 13 metallatranes
Source: Royal Society of Chemistry journal article supplement (doi:10.1039/c6dt04769f), 2017-01-01
Supplement: c6dt04769f1.pdf [file c6dt04769f1.pdf]

## Supplementary Information for

### Structure and Dynamic Behavior of Rhodium Complexes Supported by Lewis Acidic Group 13 Metallatranes

James T. Moore, Nicholas E. Smith, Connie C. Lu

Department of Chemistry, University of Minnesota, 207 Pleasant Street SE, Minneapolis, Minnesota,  
55455-0431

#### Table of Contents

| Page | SI Table of Contents:                                                                                                    |
|------|--------------------------------------------------------------------------------------------------------------------------|
| S3   | Figure S1. Full cyclic voltammogram of <b>1-Cl</b>                                                                       |
| S3   | Figure S2. Full cyclic voltammogram of <b>2-Cl</b>                                                                       |
| S4   | Figure S3. $^1\text{H}$ and $^1\text{H}\{^{31}\text{P}\}$ NMR spectra of <b>1-Cl</b> at $-18^\circ\text{C}$              |
| S4   | Figure S4. $^1\text{H}$ COSY NMR spectrum of <b>1-Cl</b> at $0^\circ\text{C}$                                            |
| S5   | Figure S5. Low temperature VT $^1\text{H}$ NMR spectra of <b>1-Cl</b>                                                    |
| S5   | Figure S6. High temperature VT $^1\text{H}$ NMR spectra of <b>1-Cl</b>                                                   |
| S6   | Figure S7. $^1\text{H}$ NMR spectrum of <b>1-Cl</b> at $107^\circ\text{C}$                                               |
| S6   | Figure S8. $^{31}\text{P}\{^1\text{H}\}$ NMR spectrum of <b>1-Cl</b> at $-18^\circ\text{C}$                              |
| S7   | Figure S9. High temperature VT $^{31}\text{P}\{^1\text{H}\}$ NMR spectra of <b>1-Cl</b>                                  |
| S8   | Figure S10. $^1\text{H}$ and $^1\text{H}\{^{31}\text{P}\}$ NMR spectra of <b>2-Cl</b> at $-49^\circ\text{C}$             |
| S8   | Figure S11. $^1\text{H}$ COSY NMR spectrum of <b>2-Cl</b> at $0^\circ\text{C}$                                           |
| S9   | Figure S12. Low temperature VT $^1\text{H}$ NMR spectra of <b>2-Cl</b>                                                   |
| S9   | Figure S13. High temperature VT $^1\text{H}$ NMR spectra of <b>2-Cl</b>                                                  |
| S9   | Figure S14. $^1\text{H}$ NMR spectrum of <b>2-Cl</b> at $75^\circ\text{C}$                                               |
| S10  | Figure S15. $^{31}\text{P}\{^1\text{H}\}$ NMR spectrum of <b>2-Cl</b> at $-18^\circ\text{C}$                             |
| S10  | Figure S16. High temperature VT $^{31}\text{P}\{^1\text{H}\}$ NMR spectra of <b>2-Cl</b>                                 |
| S11  | Figure S17. $^{31}\text{P}\{^1\text{H}\}$ NMR spectra of <b>2-Cl</b> at $119^\circ\text{C}$                              |
| S11  | Figure S18. $^1\text{H}$ and $^1\text{H}\{^{31}\text{P}\}$ NMR spectra of <b>1-CH<sub>3</sub></b> at $-18^\circ\text{C}$ |
| S12  | Figure S19. $^1\text{H}$ COSY NMR spectrum of <b>1-CH<sub>3</sub></b> at $-18^\circ\text{C}$                             |
| S12  | Figure S20. Low temperature VT $^1\text{H}$ NMR spectra of <b>1-CH<sub>3</sub></b>                                       |
| S13  | Figure S21. High temperature VT $^1\text{H}$ NMR spectra of <b>1-CH<sub>3</sub></b>                                      |
| S13  | Figure S22. $^{31}\text{P}\{^1\text{H}\}$ NMR spectrum of <b>1-CH<sub>3</sub></b> at $7^\circ\text{C}$                   |
| S13  | Figure S23. VT $^{31}\text{P}\{^1\text{H}\}$ NMR spectra of <b>1-CH<sub>3</sub></b>                                      |
| S14  | Figure S24. $^{31}\text{P}\{^1\text{H}\}$ NMR spectrum of <b>1-CH<sub>3</sub></b> at $97^\circ\text{C}$                  |
| S14  | Figure S25. $^1\text{H}$ and $^1\text{H}\{^{31}\text{P}\}$ NMR spectra of <b>2-CH<sub>3</sub></b> at $-13^\circ\text{C}$ |
| S15  | Figure S26. $^1\text{H}$ NMR of <b>2-CH<sub>3</sub></b> sample sent for elemental analysis in THF- $d_8$ .               |
| S15  | Figure S27. $^1\text{H}$ COSY NMR spectrum of <b>2-CH<sub>3</sub></b> at $-13^\circ\text{C}$                             |
| S15  | Figure S28. Low temperature VT $^1\text{H}$ NMR spectra of <b>2-CH<sub>3</sub></b>                                       |
| S16  | Figure S29. High temperature VT $^1\text{H}$ NMR spectra of <b>2-CH<sub>3</sub></b>                                      |
| S16  | Figure S30. $^{31}\text{P}\{^1\text{H}\}$ NMR spectrum of <b>2-CH<sub>3</sub></b> at $3^\circ\text{C}$                   |
| S16  | Figure S31. VT $^{31}\text{P}\{^1\text{H}\}$ NMR spectra of <b>2-CH<sub>3</sub></b>                                      |
| S17  | Figure S32. $^{31}\text{P}\{^1\text{H}\}$ NMR spectrum of <b>2-CH<sub>3</sub></b> at $97^\circ\text{C}$                  |
| S17  | Figure S33. $^1\text{H}$ and $^1\text{H}\{^{31}\text{P}\}$ NMR spectra of <b>1-H</b> at $25^\circ\text{C}$               |
| S18  | Figure S34. $^1\text{H}$ COSY NMR spectrum of <b>1-H</b> at $25^\circ\text{C}$                                           |
| S18  | Figure S35. Low temperature VT $^1\text{H}$ NMR spectra of <b>1-H</b>                                                    |

|     |                                                                                                            |
|-----|------------------------------------------------------------------------------------------------------------|
| S18 | Figure S36. Low temperature VT $^1\text{H}$ NMR spectra of <b>1-H</b> of hydride region                    |
| S19 | Figure S37. $^{31}\text{P}\{^1\text{H}\}$ NMR spectrum of <b>1-H</b> at $-73^\circ\text{C}$                |
| S19 | Figure S38. Low temperature VT $^{31}\text{P}\{^1\text{H}\}$ NMR spectra of <b>1-H</b>                     |
| S20 | Figure S39. $^1\text{H}$ and $^1\text{H}\{^{31}\text{P}\}$ NMR spectra of <b>2-H</b> at $25^\circ\text{C}$ |
| S20 | Figure S40. $^1\text{H}$ COSY NMR spectrum of <b>2-H</b> at $25^\circ\text{C}$                             |
| S21 | Figure S41. Low temperature VT $^1\text{H}$ NMR spectra of <b>2-H</b>                                      |
| S21 | Figure S42. Low temperature VT $^1\text{H}$ NMR spectra of <b>2-H</b> of hydride region                    |
| S21 | Figure S43. High temperature VT $^1\text{H}$ NMR spectra of <b>2-H</b>                                     |
| S22 | Figure S44. $^{31}\text{P}\{^1\text{H}\}$ NMR spectrum of <b>2-H</b> at $-49^\circ\text{C}$                |
| S22 | Figure S45. Low temperature VT $^{31}\text{P}\{^1\text{H}\}$ NMR spectra of <b>2-H</b>                     |
| S23 | Figure S46. High temperature VT $^{31}\text{P}\{^1\text{H}\}$ NMR spectra of <b>2-H</b>                    |
| S23 | Figure S47. $^{31}\text{P}\{^1\text{H}\}$ NMR spectrum of <b>2-H</b> at $97^\circ\text{C}$                 |
| S24 | Table S1. Calculation of rate constants and energy barriers that equilibrate $^{31}\text{P}$ nuclei        |
| S24 | References                                                                                                 |

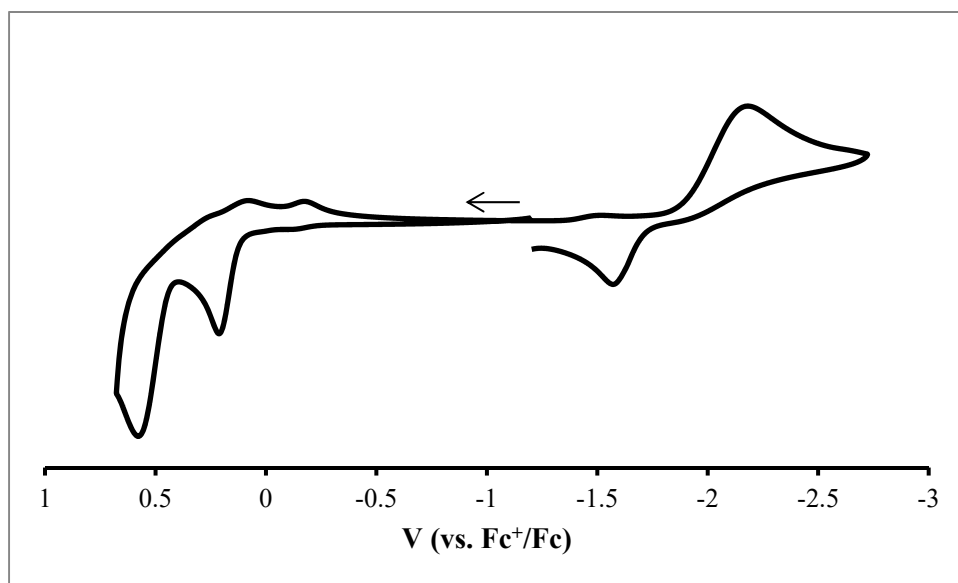

**Figure S1.** Full cyclic voltammogram of **1-Cl** (100 mV/s) in 0.1 M TBAPF<sub>6</sub> in THF referenced to the Fc/Fc<sup>+</sup> redox couple. First oxidation  $E_{pa} = 0.21$  V; second oxidation  $E_{pa} = 1.00$  V.

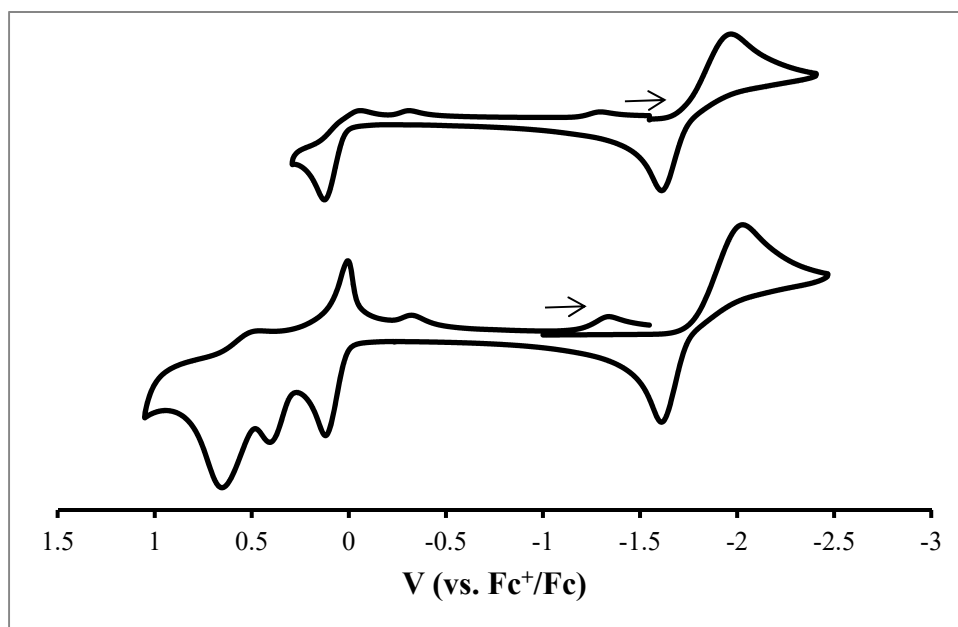

**Figure S2.** Cyclic voltammogram of **2-Cl** (100 mV/s) in 0.1 M TBAPF<sub>6</sub> in THF referenced to the Fc/Fc<sup>+</sup> redox couple. First oxidation  $E_{pa} = 0.12$  V; second oxidation  $E_{pa} = 0.41$  V; third oxidation  $E_{pa} = 0.65$ . The return reduction at  $E_{pc} = 0.81$  V is absent in the top CV, demonstrating that it is an electrochemical event not related to the first oxidation.

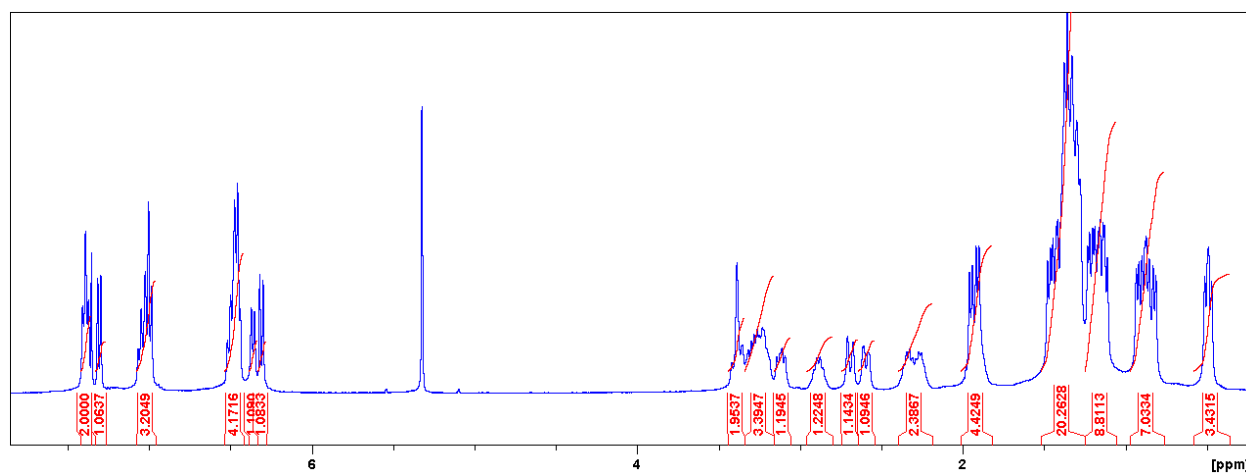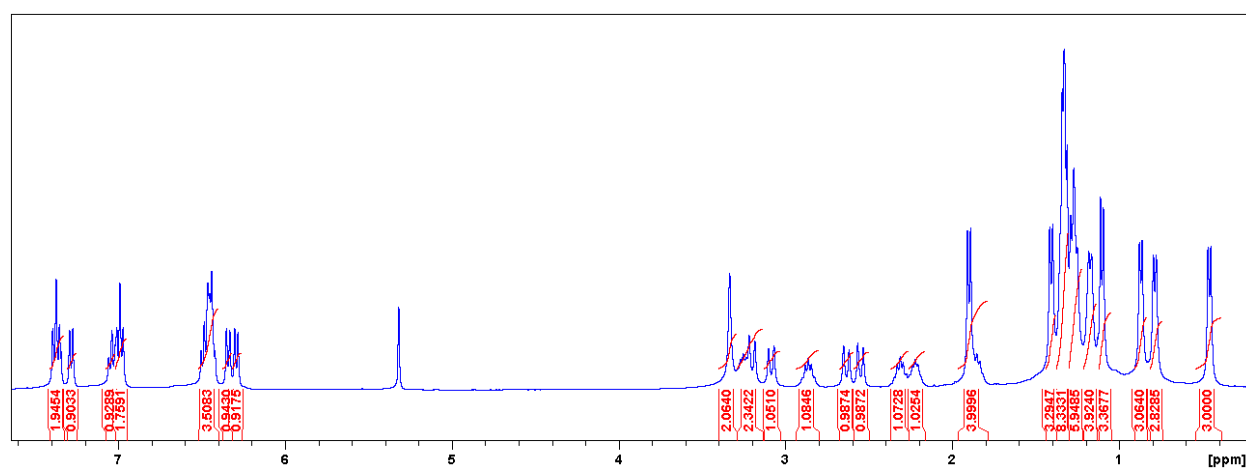

**Figure S3.**  $^1\text{H}$  (top) and  $^1\text{H}\{^{31}\text{P}\}$  (bottom) NMR spectra of **1-Cl** (400 MHz) in  $\text{CD}_2\text{Cl}_2$  at  $-18^\circ\text{C}$ .

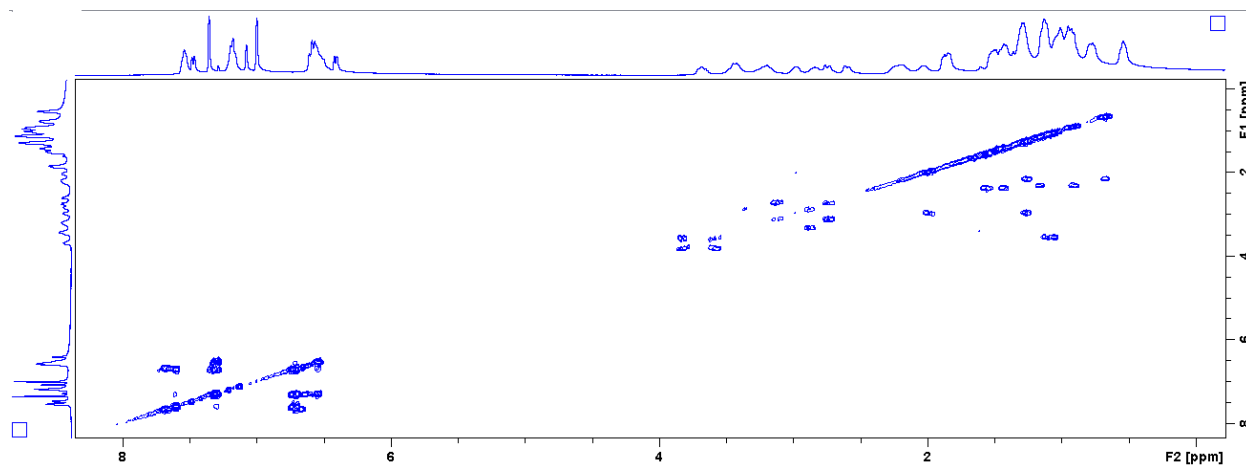

**Figure S4.**  $^1\text{H}$  COSY NMR spectrum of **1-Cl** (400 MHz) in  $\text{C}_6\text{D}_5\text{Br}$  at  $0^\circ\text{C}$ .

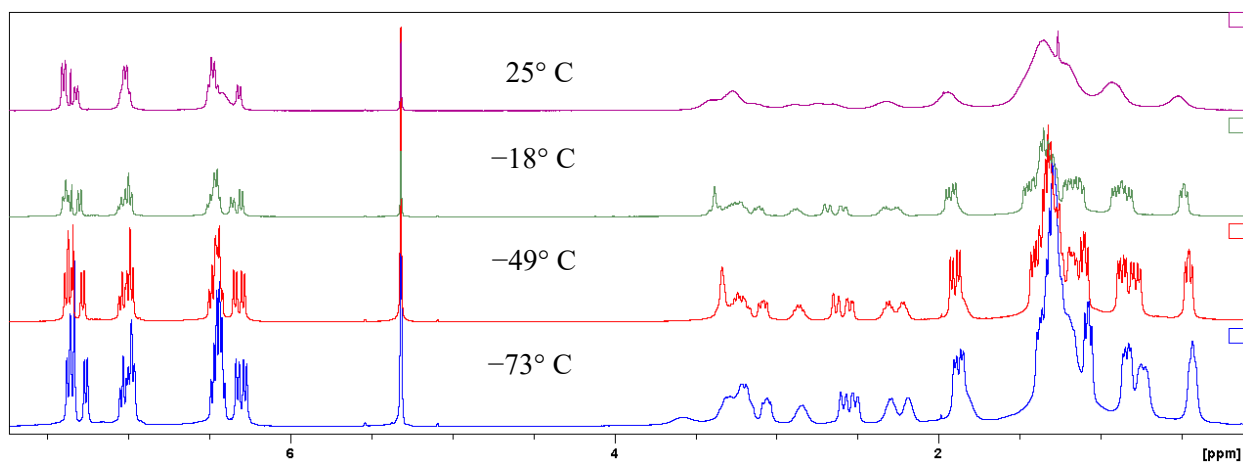

**Figure S5.** Low temperature VT  $^1\text{H}$  NMR spectrum of **1-Cl** (400 MHz) in  $\text{CD}_2\text{Cl}_2$ . In order from bottom to top:  $-73^\circ\text{C}$ ,  $-49^\circ\text{C}$ ,  $-18^\circ\text{C}$ , and  $25^\circ\text{C}$ .

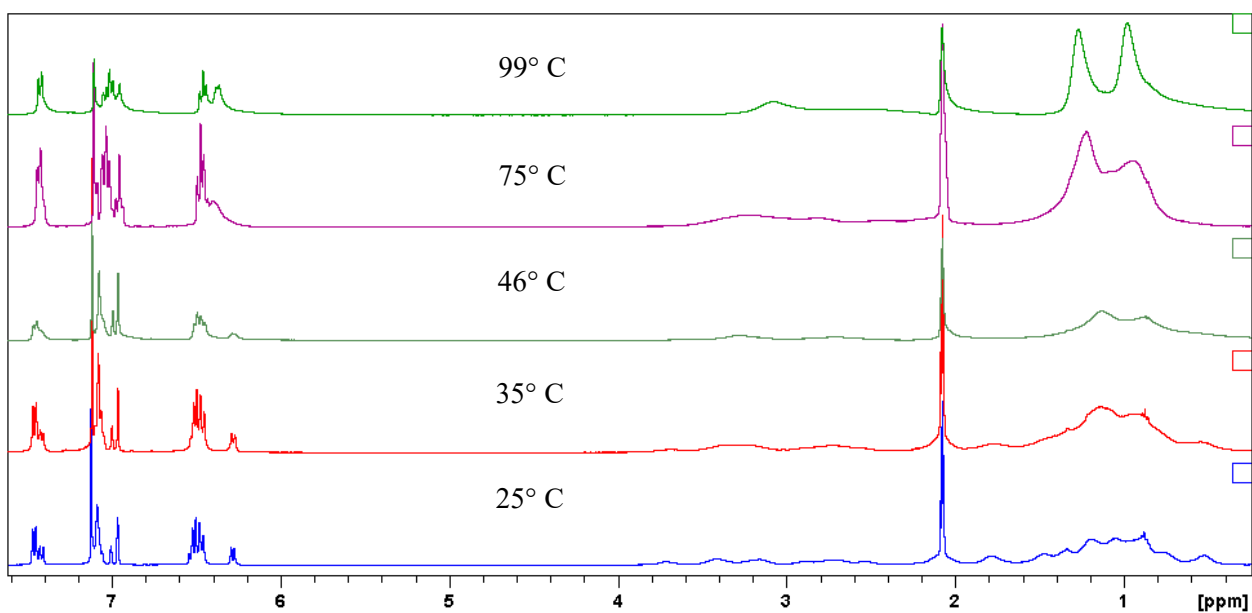

**Figure S6.** High temperature VT  $^1\text{H}$  NMR spectrum of **1-Cl** (400 MHz) in toluene- $d_8$ .

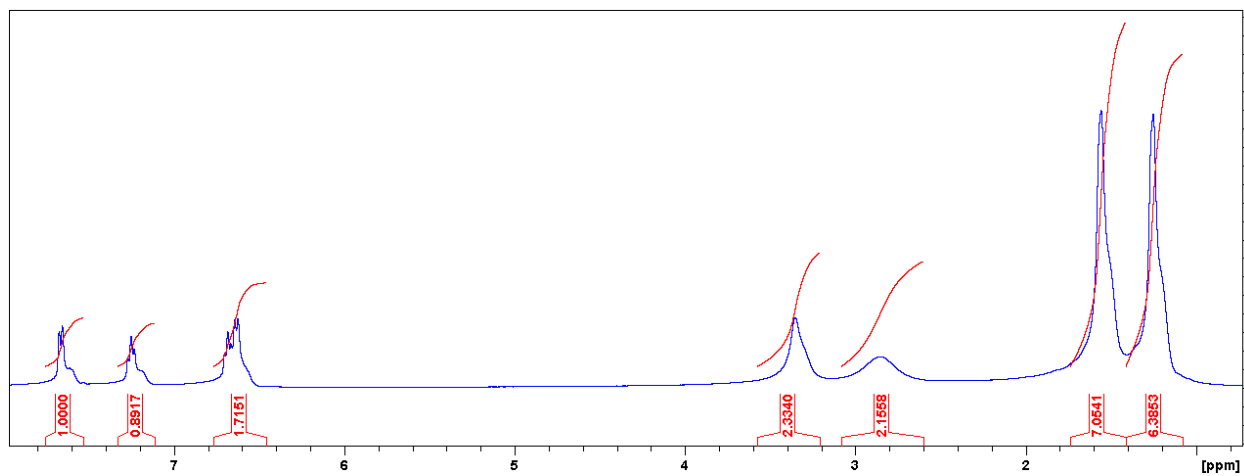

**Figure S7.**  $^1\text{H}$  NMR spectrum of **1-Cl** (400 MHz) in  $\text{C}_6\text{D}_5\text{Br}$  at  $115^\circ\text{C}$ . The bad shims are an effect of the shimming coils being at an elevated temperature.

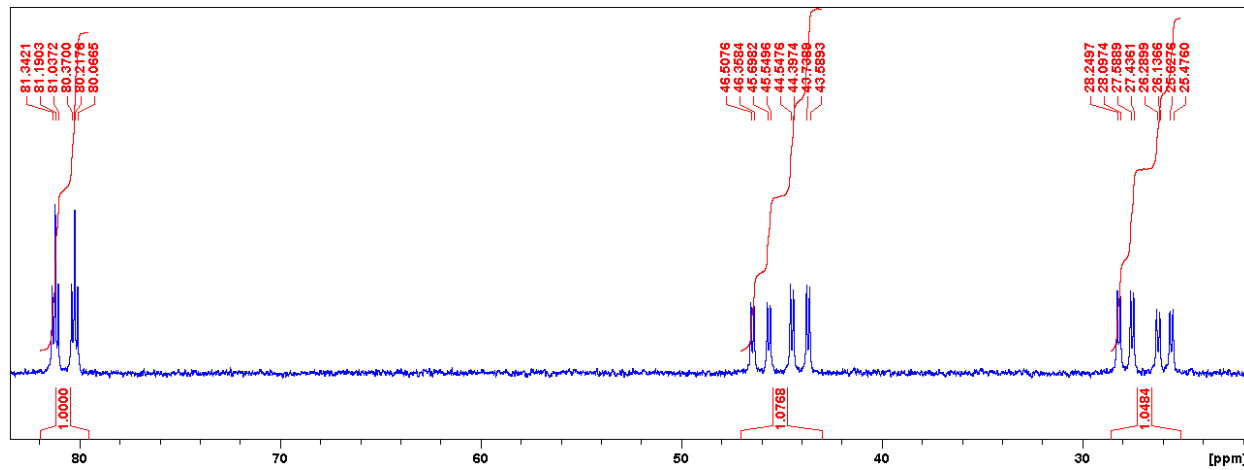

**Figure S8.**  $^{31}\text{P}\{^1\text{H}\}$  NMR spectrum of **1-Cl** (162 MHz) in  $\text{CD}_2\text{Cl}_2$  at  $-18^\circ\text{C}$ .

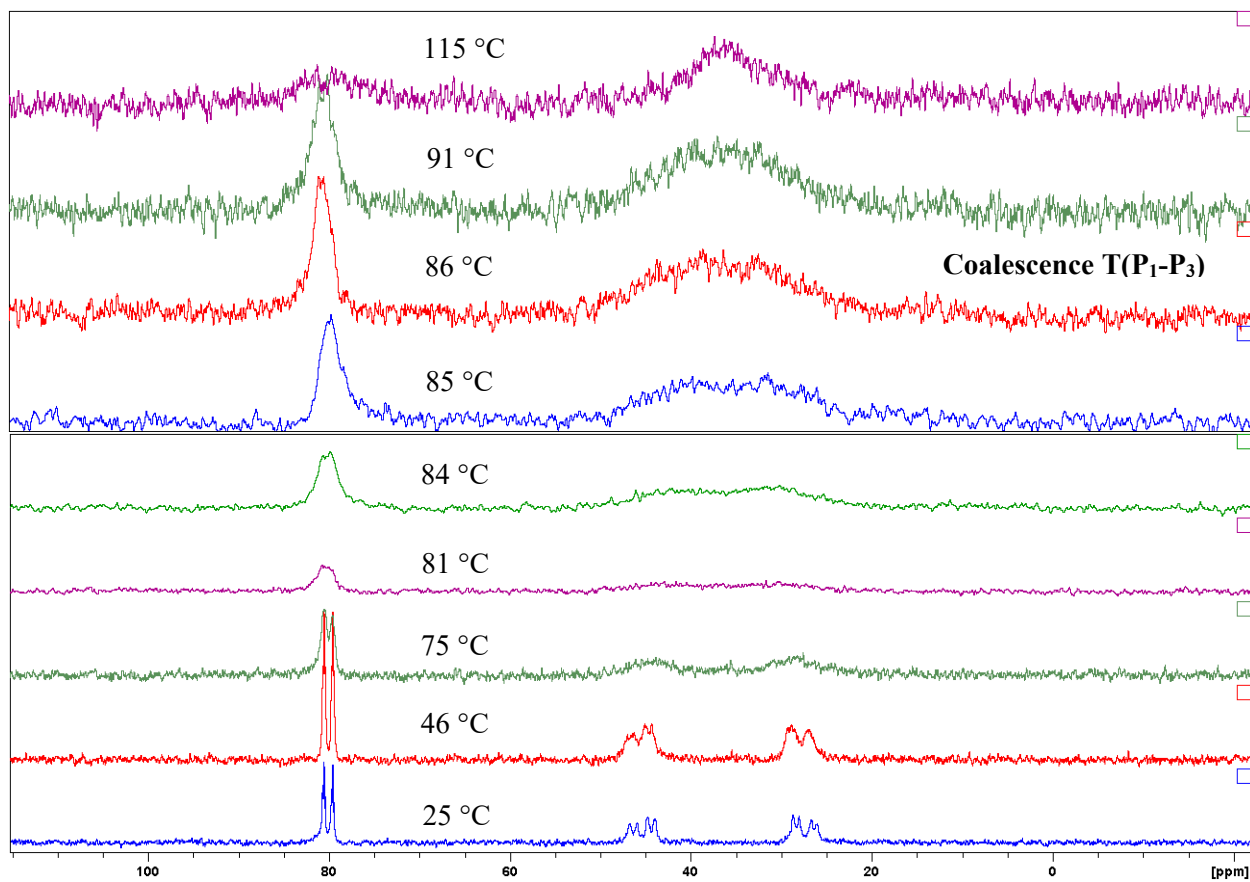

**Figure S9.** High temperature VT  $^{31}\text{P}\{^1\text{H}\}$  NMR spectra of **1-Cl** (162 MHz) in  $\text{C}_6\text{D}_5\text{Br}$ .

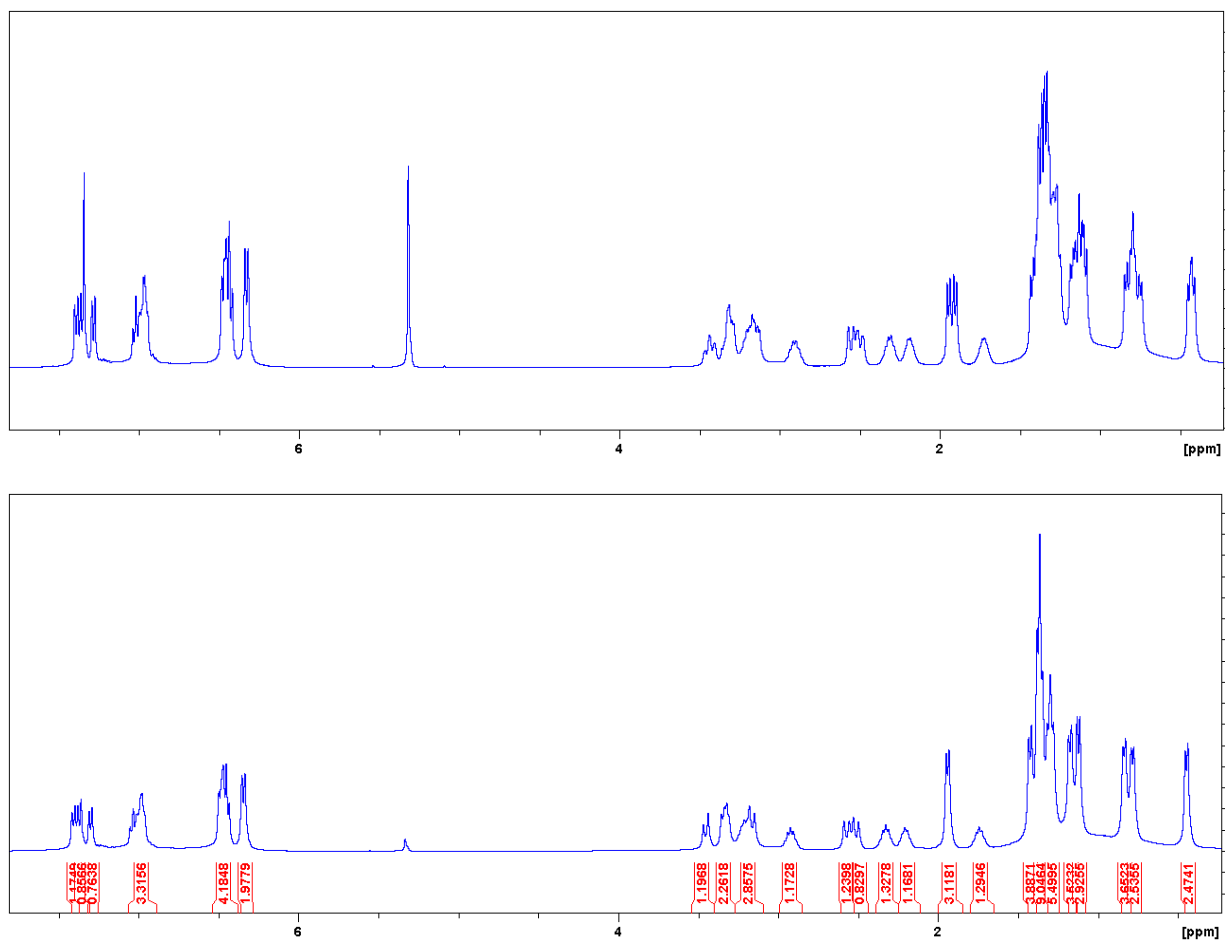

Figure S10.  $^1\text{H}$  (top) and  $^1\text{H}\{^{31}\text{P}\}$  (bottom) NMR spectra of 2-Cl (400 MHz) in  $\text{CD}_2\text{Cl}_2$  at  $-49^\circ\text{C}$ .

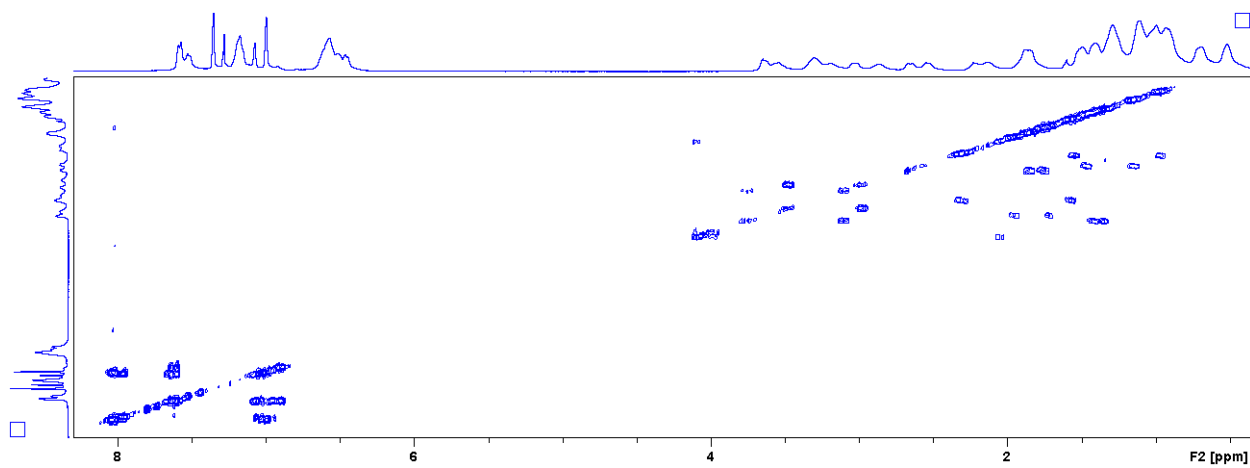

Figure S11.  $^1\text{H}$  COSY NMR spectrum of 2-Cl (400 MHz) in  $\text{C}_6\text{D}_5\text{Br}$  at  $0^\circ\text{C}$ .



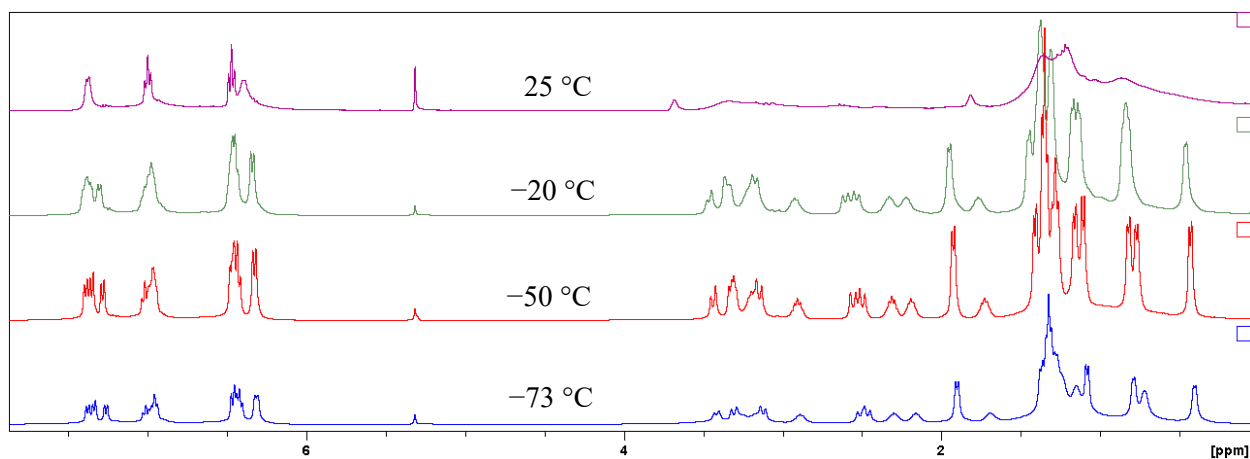

**Figure S12.** Low temperature VT  $^1\text{H}$  NMR spectrum of **2-Cl** (400 MHz) in  $\text{CD}_2\text{Cl}_2$ .

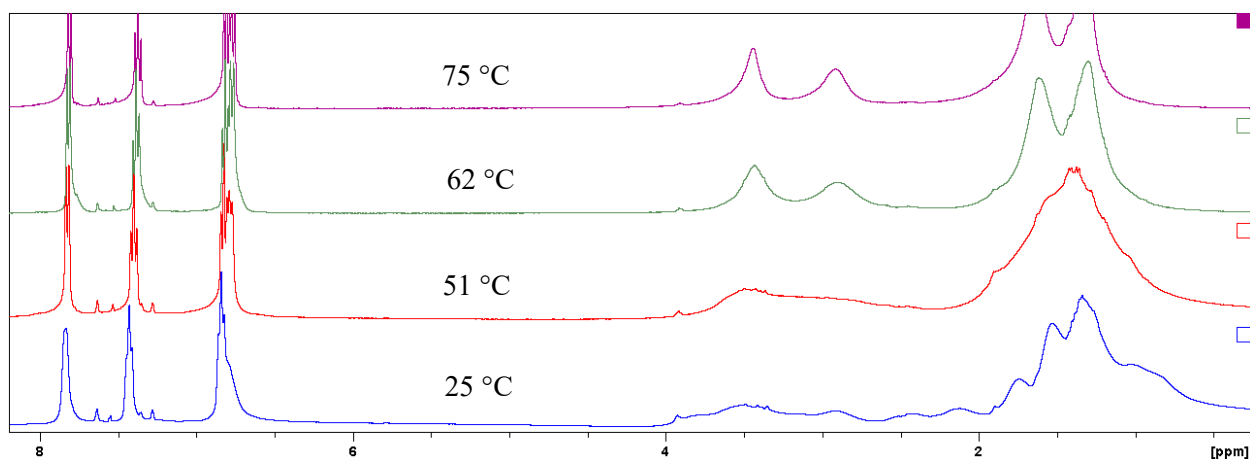

**Figure S13.** High temperature VT  $^1\text{H}$  NMR spectrum of **2-Cl** (400 MHz) in  $\text{C}_6\text{D}_5\text{Br}$ .

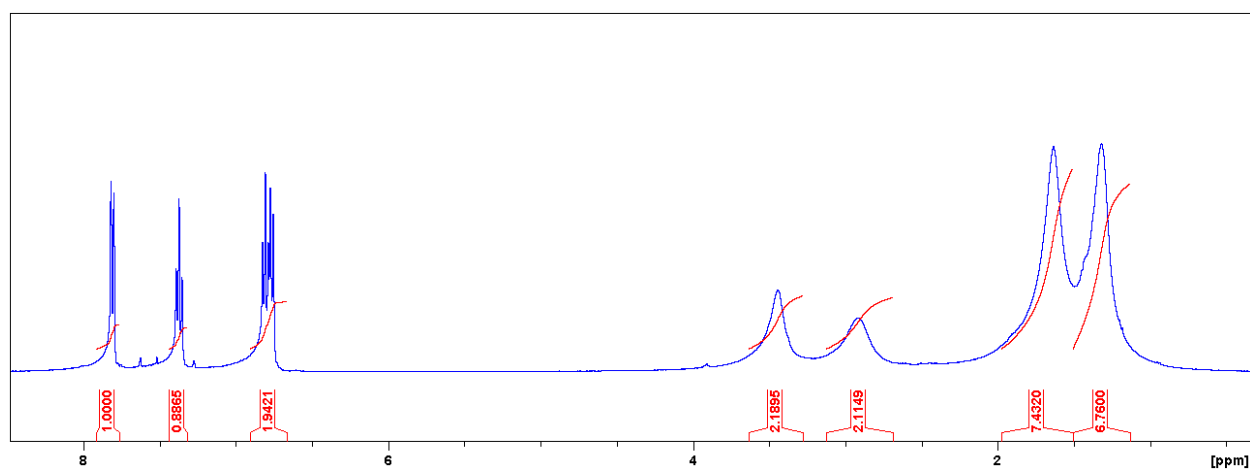

**Figure S14.**  $^1\text{H}$  NMR spectrum of **2-Cl** (400 MHz) in  $\text{C}_6\text{D}_5\text{Br}$  at  $75^\circ\text{C}$ .

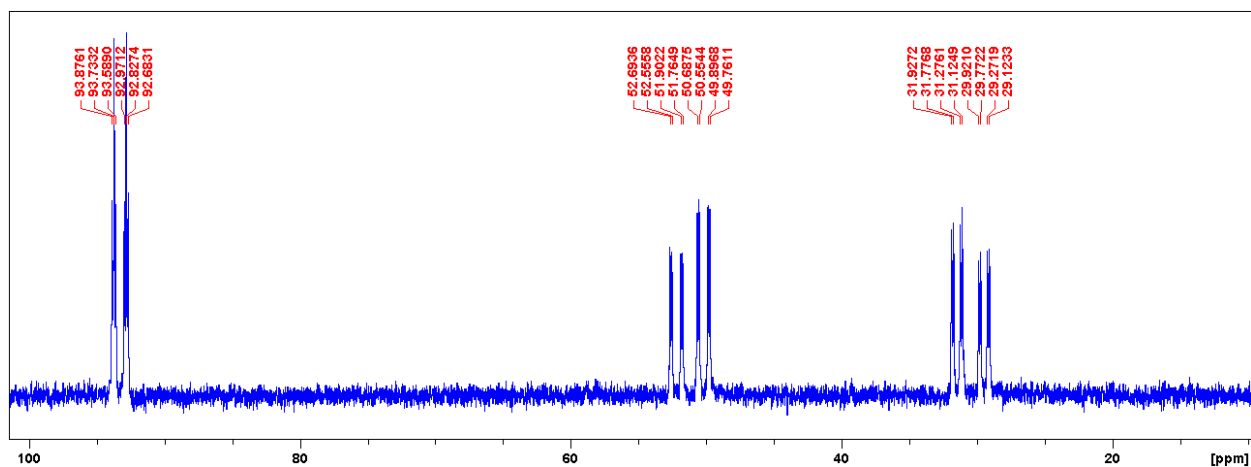

**Figure S15.**  $^{31}\text{P}\{^1\text{H}\}$  NMR spectrum of **2-Cl** (162 MHz) in  $\text{CD}_2\text{Cl}_2$  at  $-18^\circ\text{C}$ .

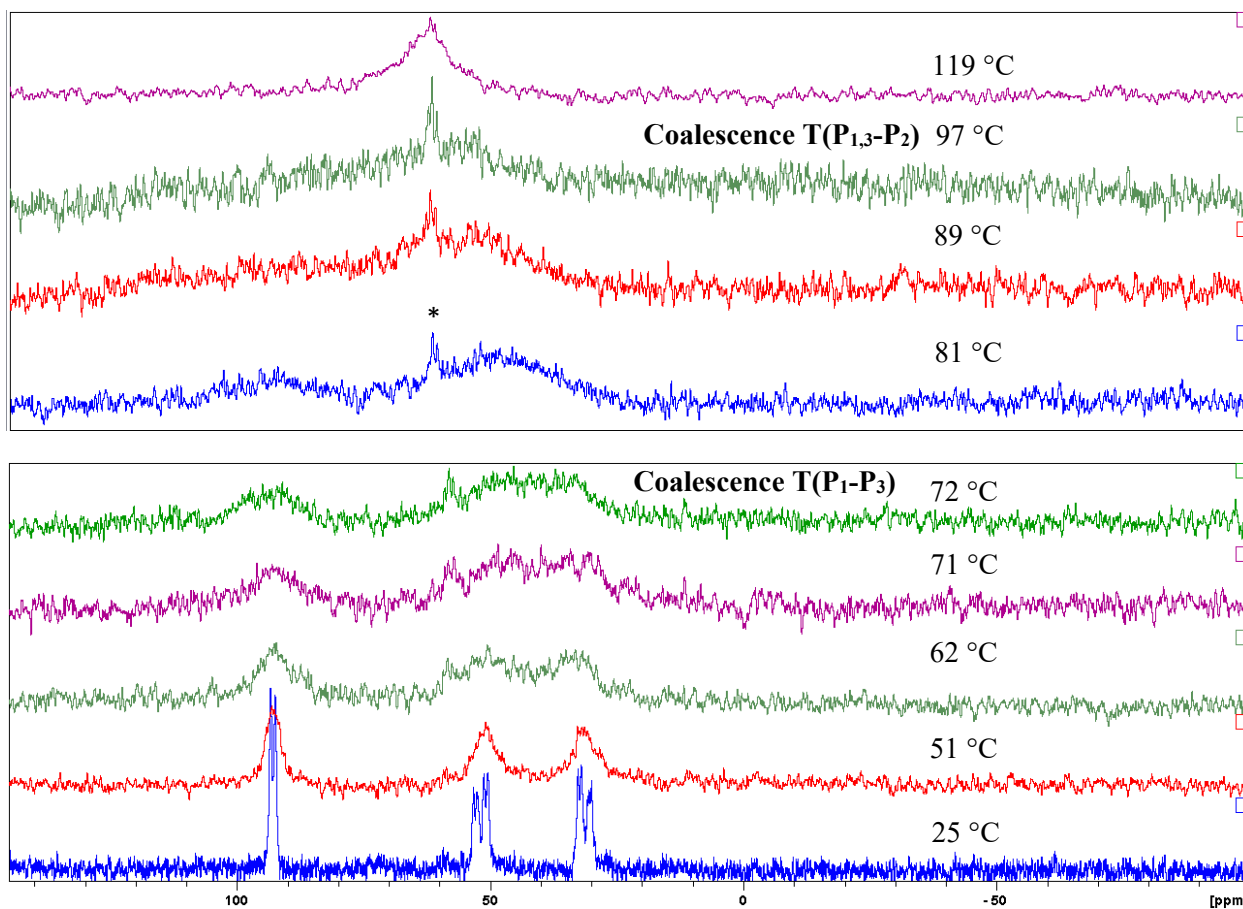

**Figure S16.** High temperature VT  $^{31}\text{P}\{^1\text{H}\}$  NMR spectra of **2-Cl** (162 MHz) in  $\text{C}_6\text{D}_5\text{Br}$ . \* denote a minor impurity. Note: The average of the three peaks at  $-18^\circ\text{C}$ :  $(93.3 + 51.2 + 30.5)/3 = 58.3$  ppm, which is close to the 58.6 ppm shift observed at high temperatures.

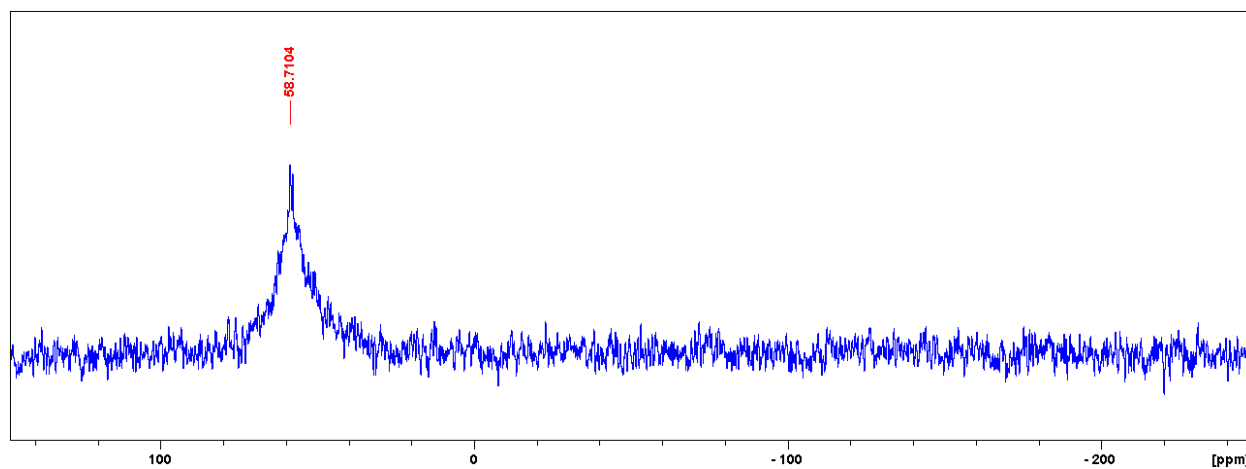

**Figure S17.**  $^{31}\text{P}\{^1\text{H}\}$  NMR spectrum of **2-Cl** (162 MHz) in  $\text{C}_6\text{D}_5\text{Br}$  at  $107^\circ\text{C}$ .

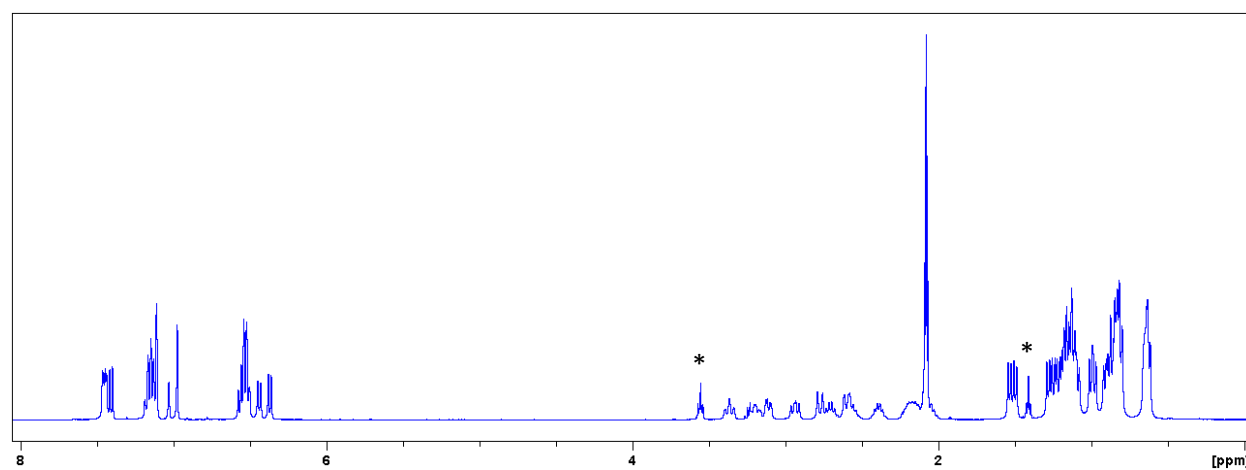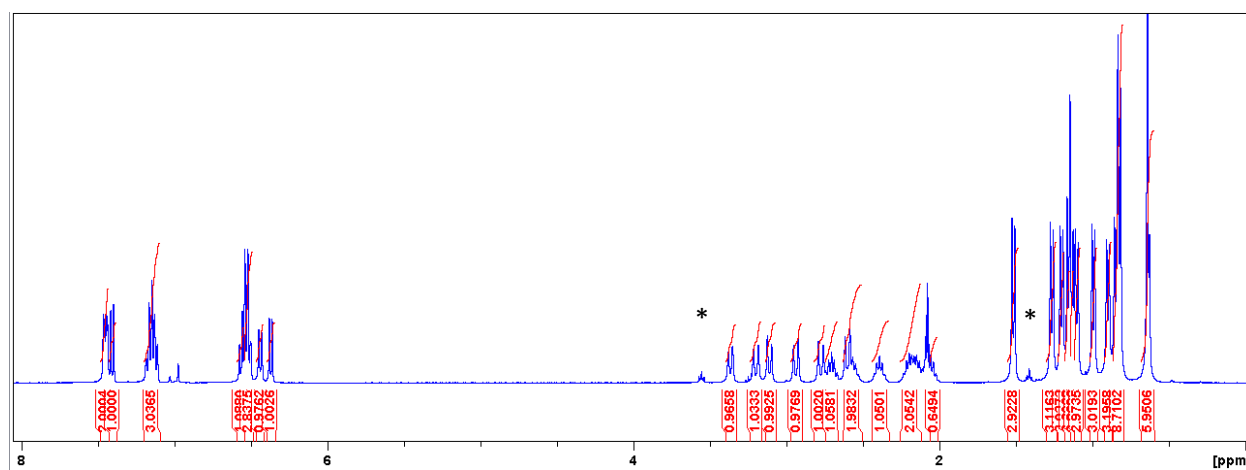

**Figure S18.**  $^1\text{H}$  (top) and  $^1\text{H}\{^{31}\text{P}\}$  (bottom) NMR spectra of **1-CH<sub>3</sub>** (400 MHz) in  $\text{toluene-}d_8$  at  $-18^\circ\text{C}$ . \* denotes residual THF.

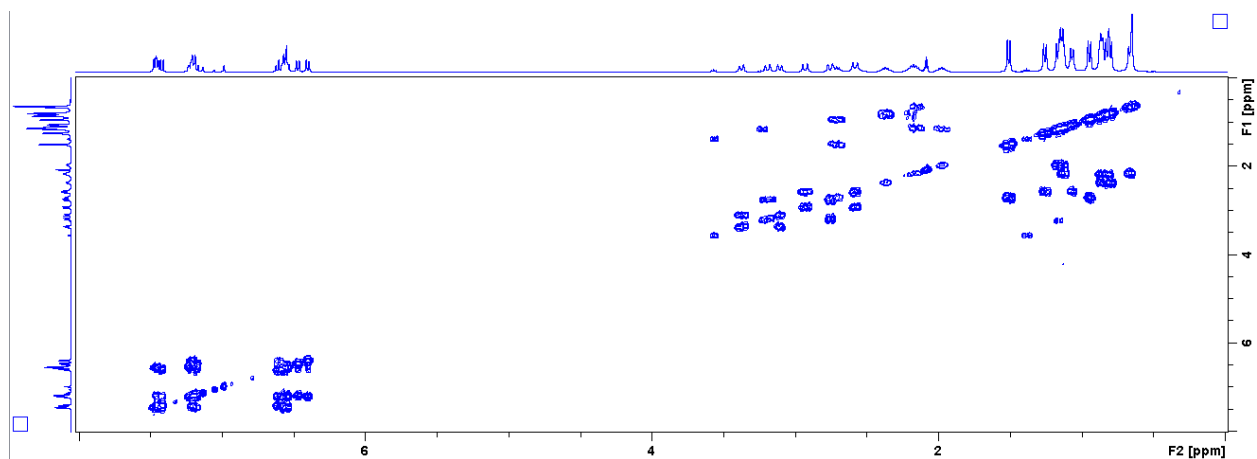

**Figure S19.**  $^1\text{H}$  COSY NMR spectrum of **1-CH<sub>3</sub>** (400 MHz) in toluene- $d_8$  at  $-18^\circ\text{C}$ .

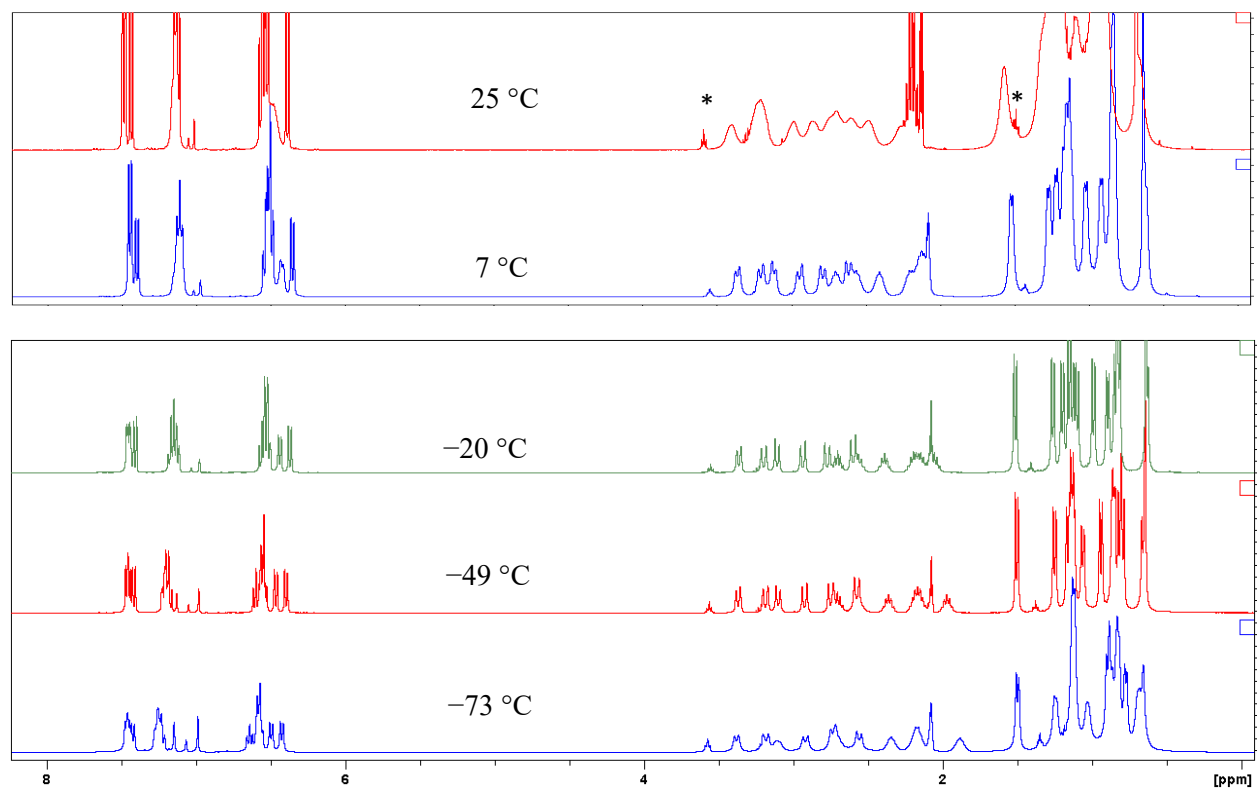

**Figure S20.** Low temperature VT  $^1\text{H}\{^{31}\text{P}\}$  NMR spectrum of **1-CH<sub>3</sub>** (400 MHz) in toluene- $d_8$ . \* denotes residual THF.

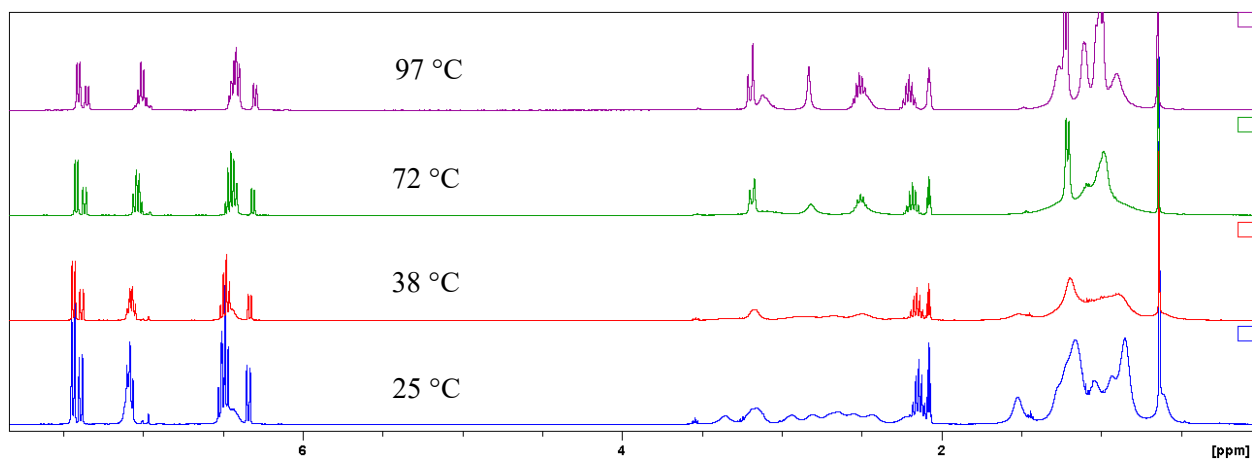

**Figure S21.** High temperature VT  $^1\text{H}$  NMR spectrum of **1-CH<sub>3</sub>** (400 MHz) in toluene- $d_8$ .

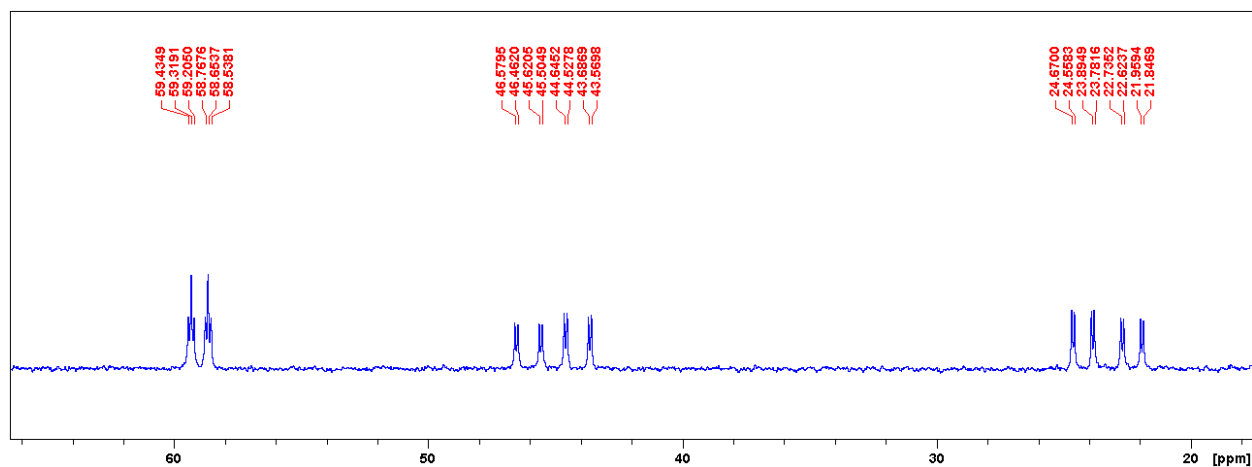

**Figure S22.**  $^{31}\text{P}\{^1\text{H}\}$  NMR spectrum of **1-CH<sub>3</sub>** (162 MHz) in toluene- $d_8$  at  $-18^\circ\text{C}$ .

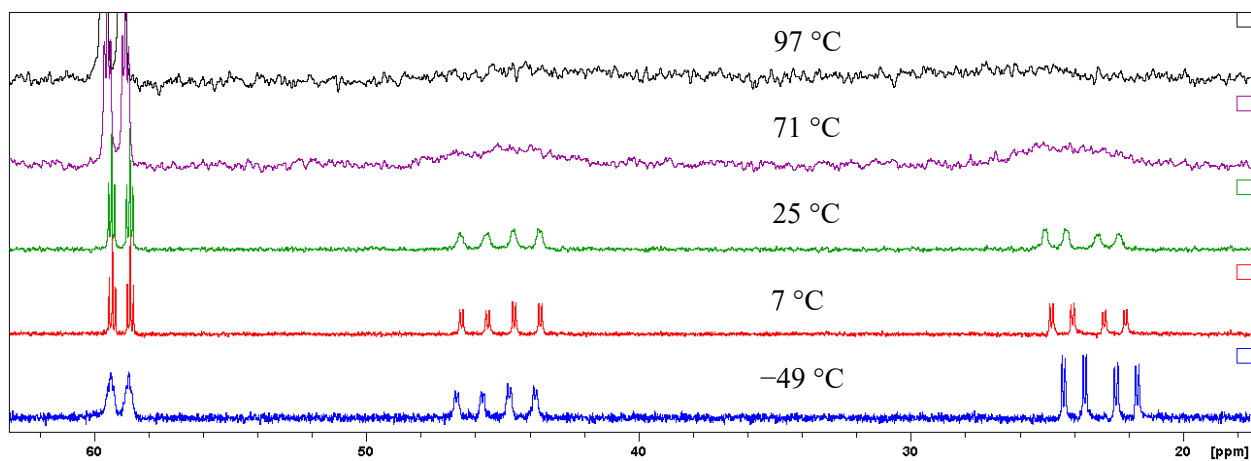

**Figure S23.** VT  $^{31}\text{P}\{^1\text{H}\}$  NMR spectra of **1-CH<sub>3</sub>** (162 MHz) in toluene-*d*<sub>8</sub>.

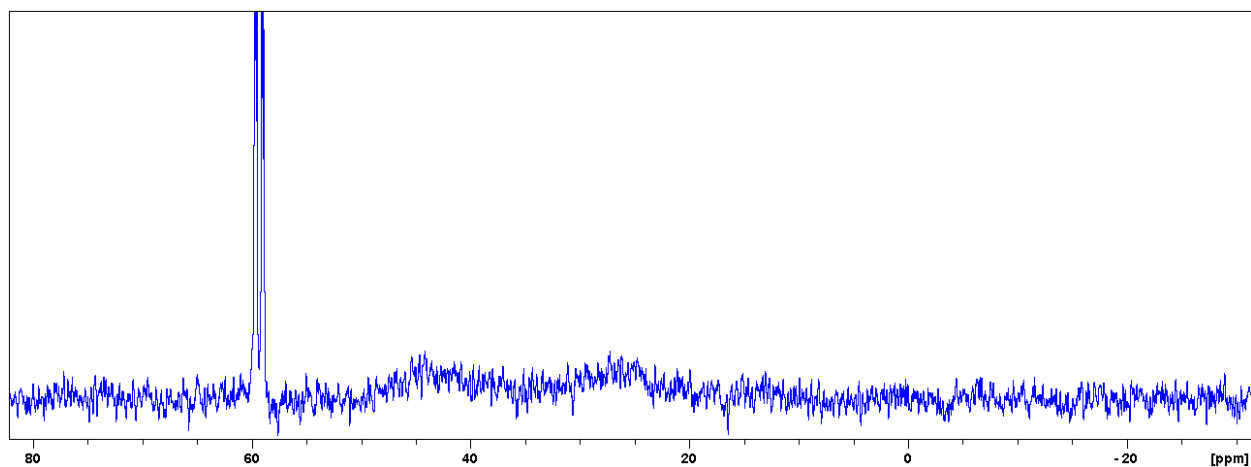

**Figure S24.**  $^{31}\text{P}\{^1\text{H}\}$  NMR spectrum of **1-CH<sub>3</sub>** (162 MHz) in toluene-*d*<sub>8</sub> at 97°C. The peaks for  $P_1$  and  $P_3$  have not yet coalesced at this temperature.

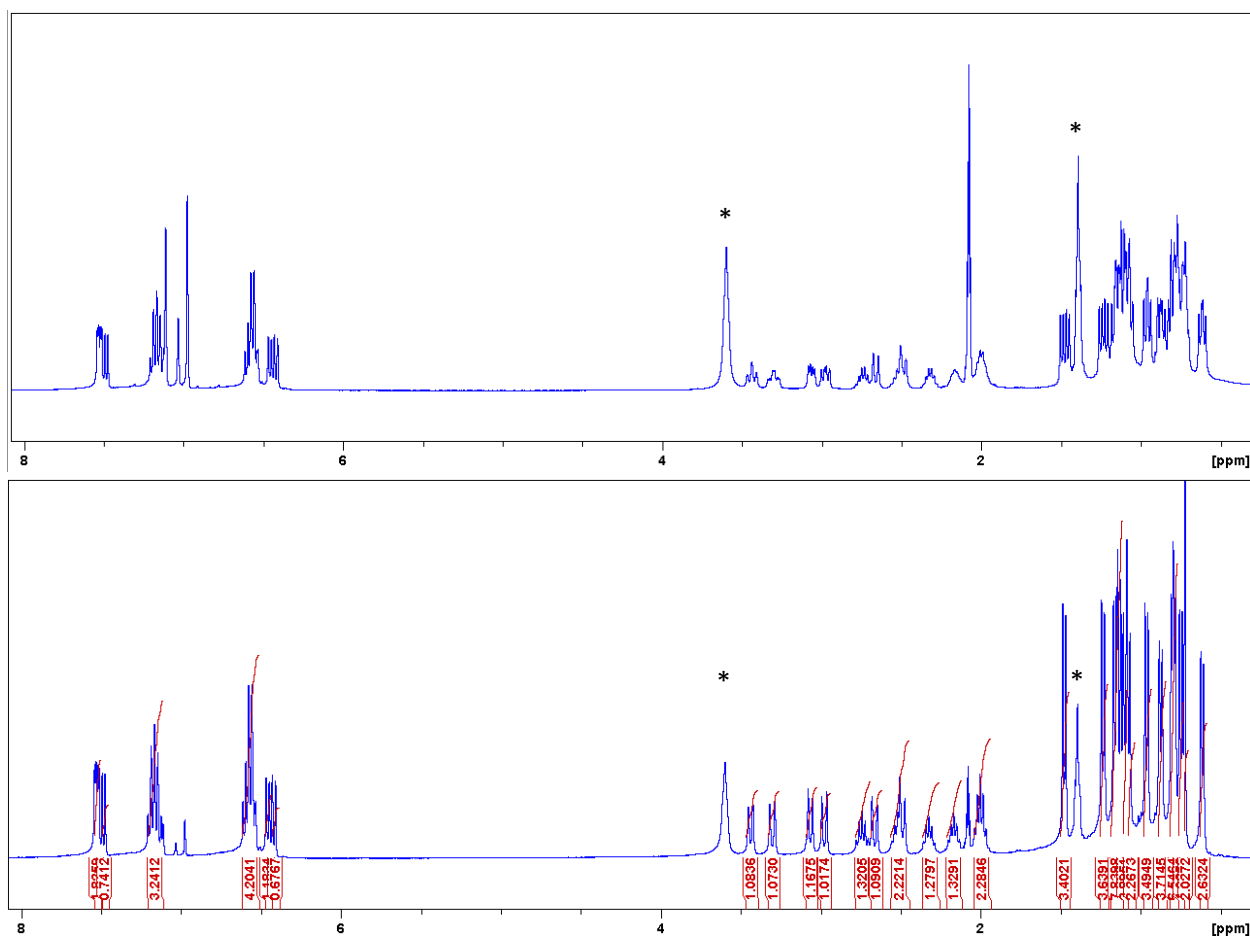

**Figure S25.** <sup>1</sup>H (top) and <sup>1</sup>H{<sup>31</sup>P} (bottom) NMR spectra of **2-CH<sub>3</sub>** (400 MHz) in toluene-*d*<sub>8</sub> at -13°C. \* denotes residual THF.

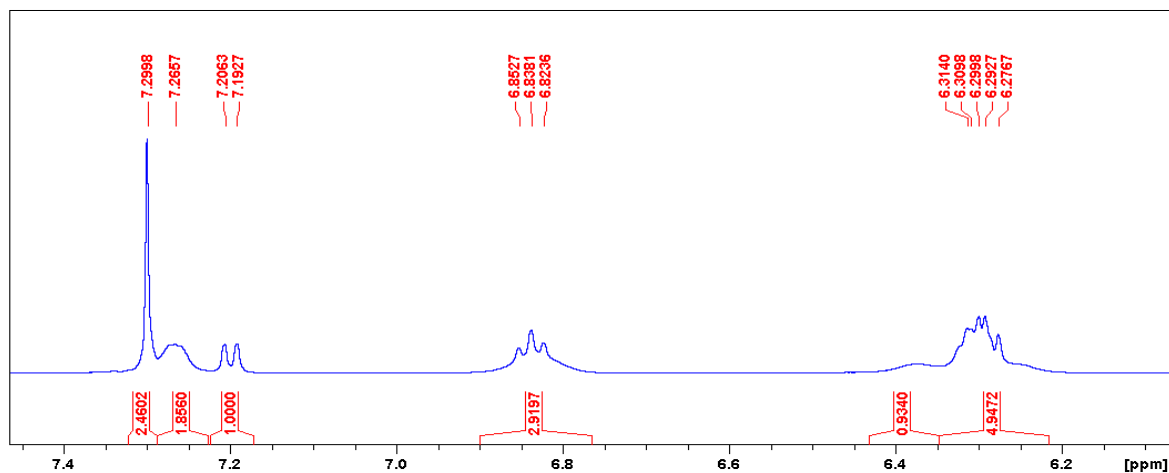

**Figure S26.** <sup>1</sup>H NMR spectrum of **2-CH<sub>3</sub>** sample sent for elemental analysis in THF-*d*<sub>8</sub>. Crystals of **2-CH<sub>3</sub>**(C<sub>6</sub>H<sub>6</sub>) was subjected to vacuum prior to elemental analysis (EA). The NMR of the aryl region for the EA sample shows that the relative integration of C<sub>6</sub>H<sub>6</sub> to **2-CH<sub>3</sub>** is 0.5 to 1.

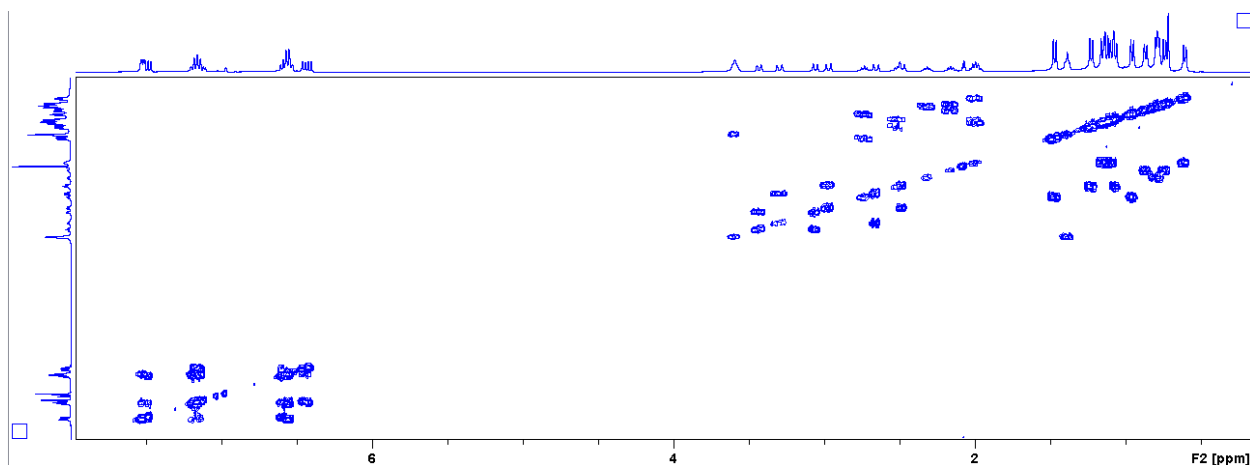

**Figure S27.**  $^1\text{H}$  COSY NMR spectrum of **2-CH<sub>3</sub>** (400 MHz) in toluene- $d_8$  at  $-13^\circ\text{C}$ .

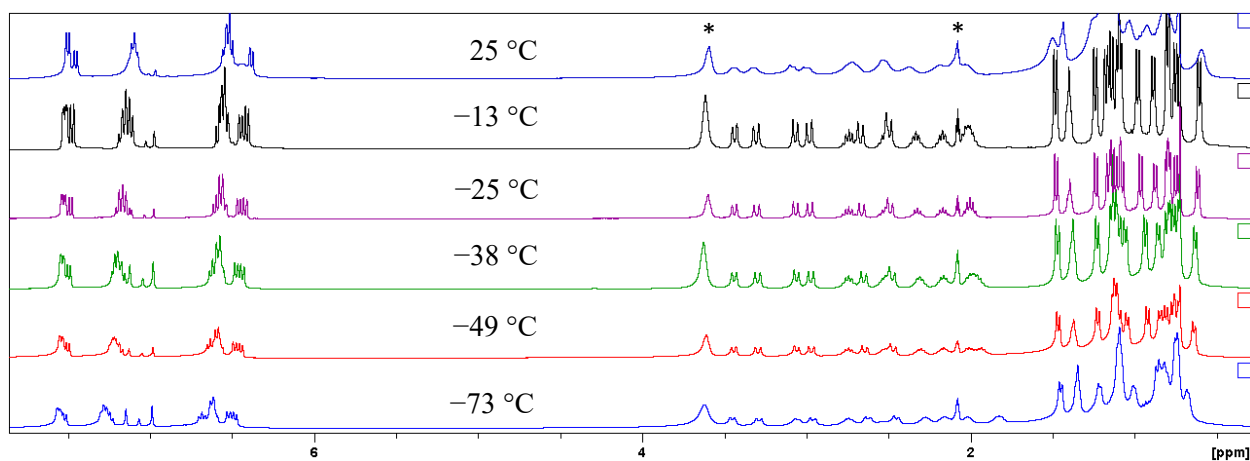

**Figure S28.** Low temperature VT  $^1\text{H}\{^{31}\text{P}\}$  NMR spectrum of **2-CH<sub>3</sub>** (400 MHz) in toluene- $d_8$ . \* denotes residual THF.

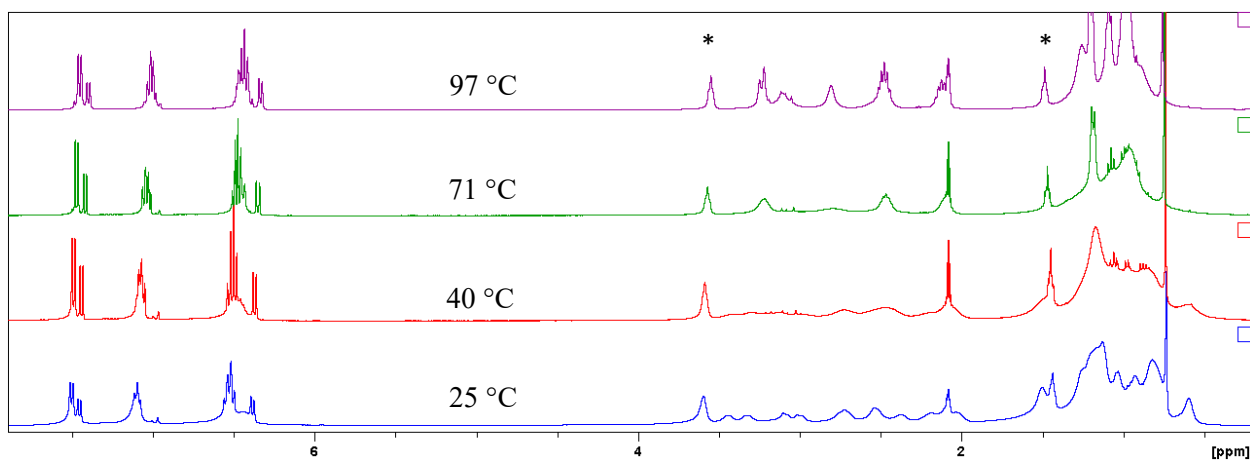

**Figure S29.** High temperature VT  $^1\text{H}\{^{31}\text{P}\}$  NMR spectrum of **2-CH<sub>3</sub>** (400 MHz) in toluene- $d_8$ . \* denotes residual THF.



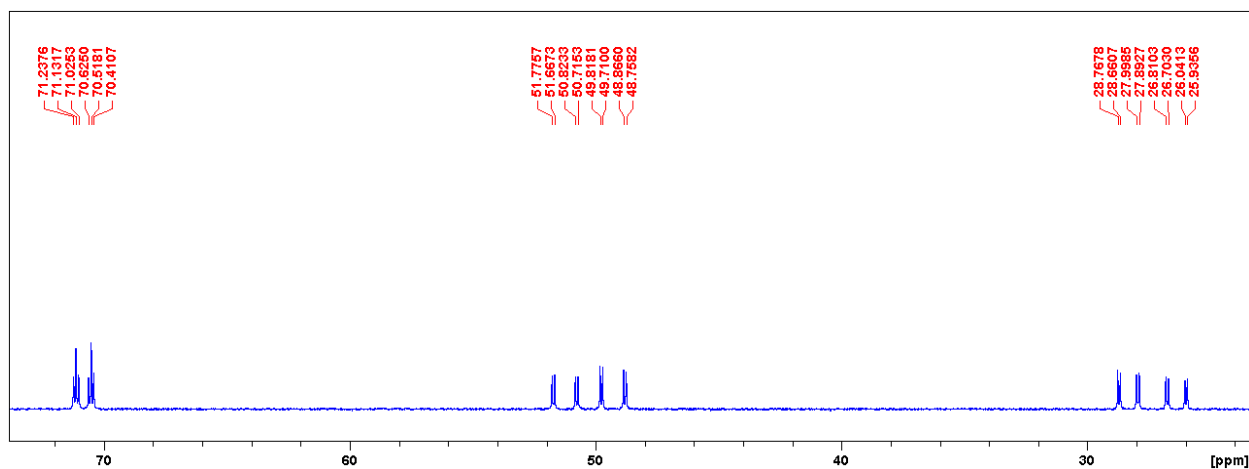

**Figure S30.**  $^{31}\text{P}\{^1\text{H}\}$  NMR spectrum of **2-CH<sub>3</sub>** (162 MHz) in toluene-*d*<sub>8</sub> at 3°C.

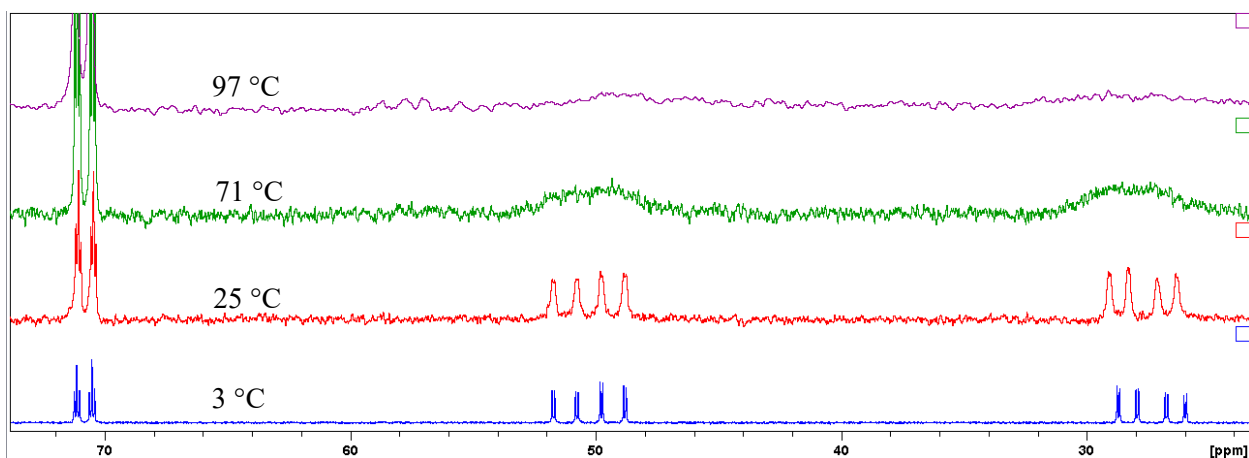

**Figure S31.** VT  $^{31}\text{P}\{^1\text{H}\}$  NMR spectra of **2-CH<sub>3</sub>** (162 MHz) in toluene-*d*<sub>8</sub>.

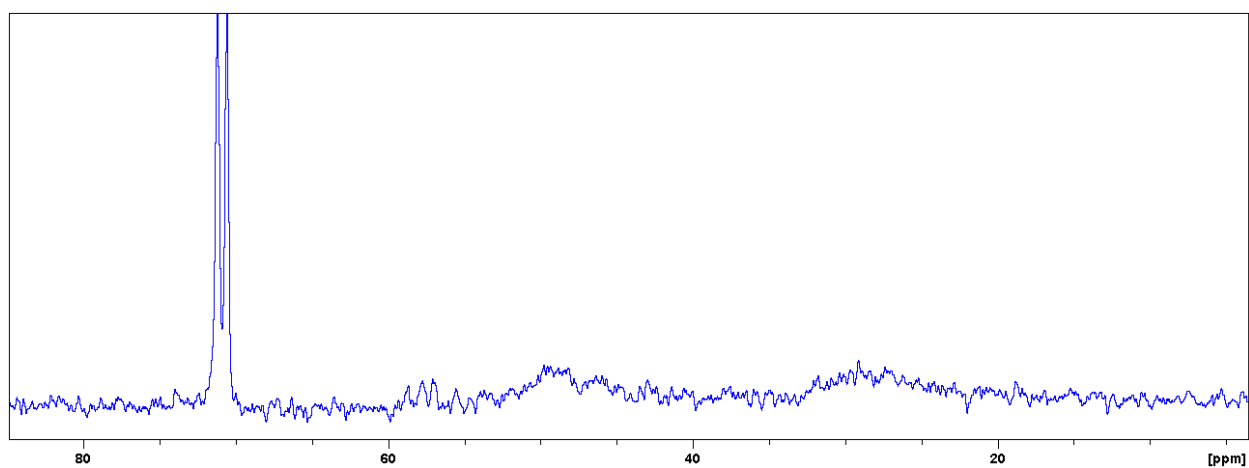

**Figure S32.**  $^{31}\text{P}\{^1\text{H}\}$  NMR spectrum of **2-CH<sub>3</sub>** (162 MHz) in toluene-*d*<sub>8</sub> at 97°C. The peaks for *P*<sub>1</sub> and *P*<sub>3</sub> have not yet coalesced at this temperature.

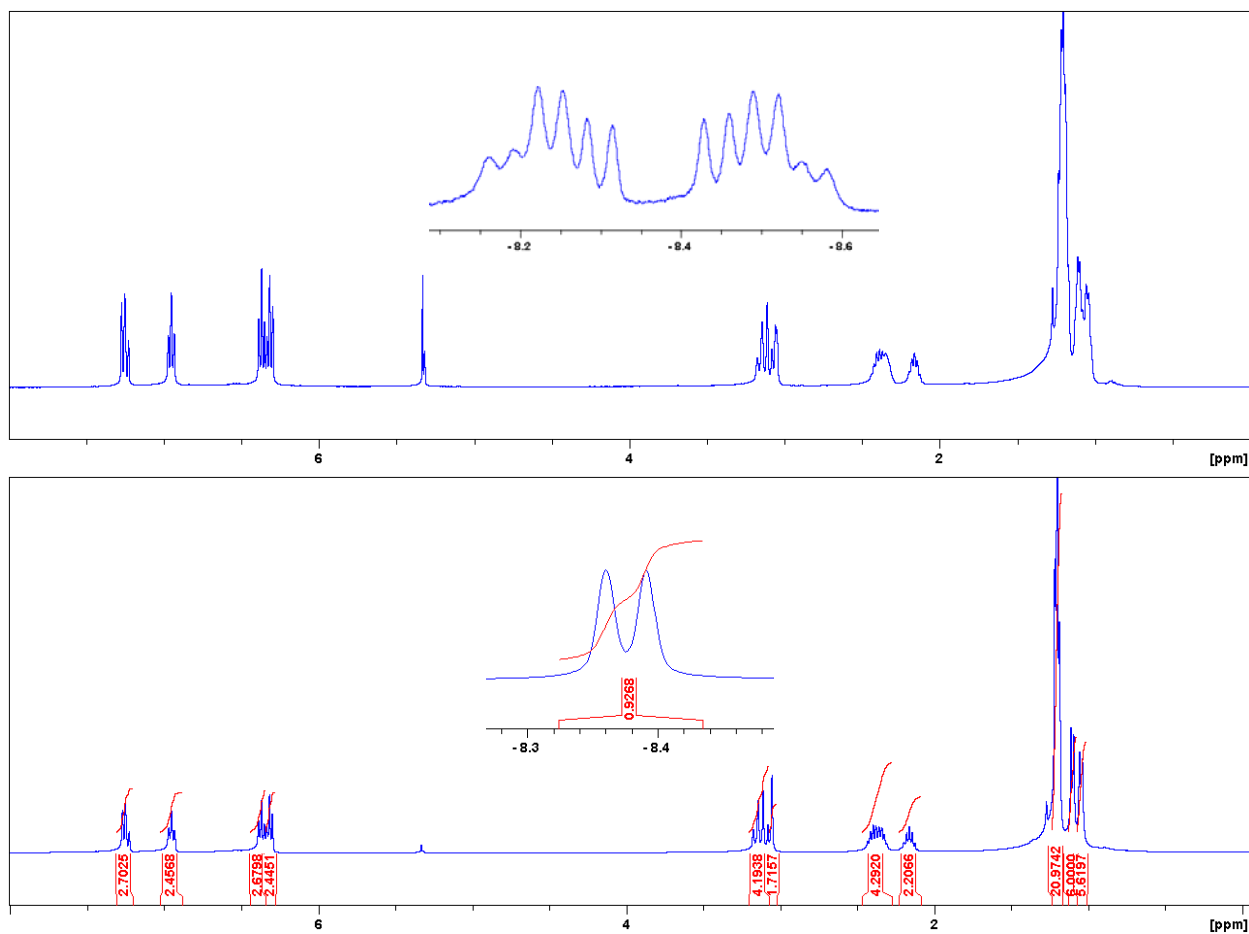

**Figure S33.**  $^1\text{H}$  (top) and  $^1\text{H}\{^{31}\text{P}\}$  (bottom) NMR spectra of **1-H** (400 MHz) in  $\text{CD}_2\text{Cl}_2$  at  $25^\circ\text{C}$ .

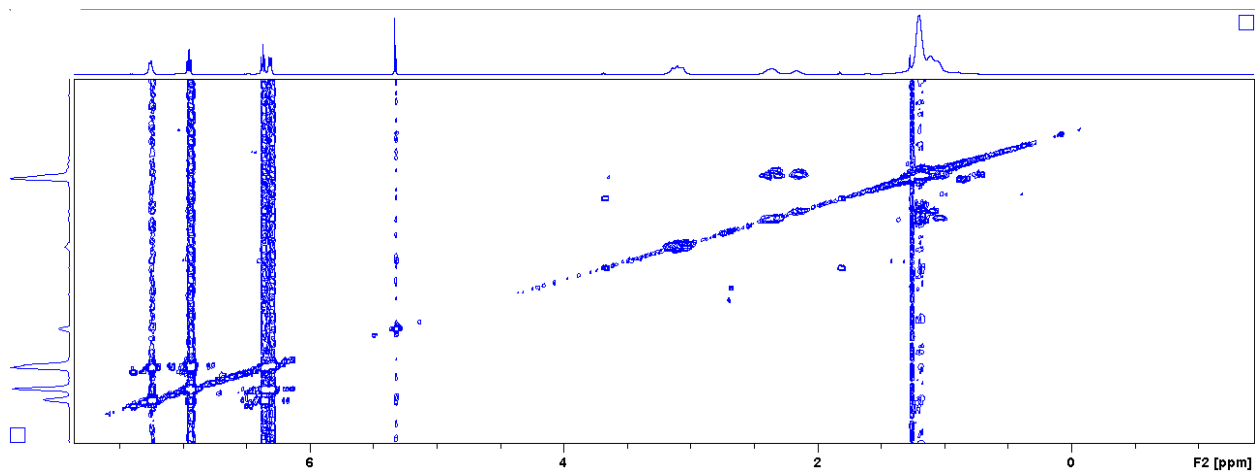

**Figure S34.**  $^1\text{H}$  COSY NMR spectrum of **1-H** (500 MHz) in  $\text{CD}_2\text{Cl}_2$  at  $25^\circ\text{C}$ .

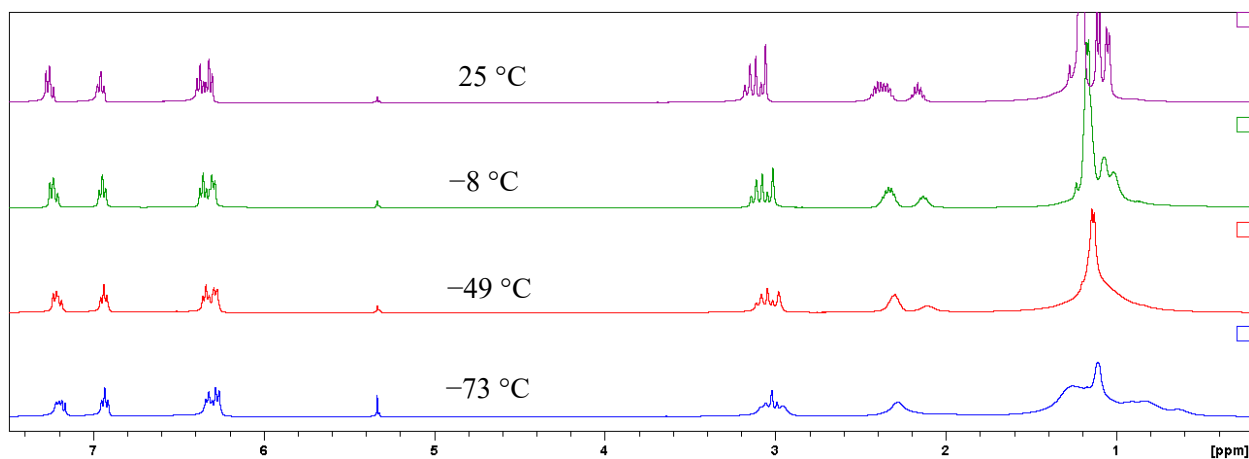

**Figure S35.** Low temperature VT  $^1\text{H}\{^{31}\text{P}\}$  NMR spectrum of **1-H** (400 MHz) in  $\text{CD}_2\text{Cl}_2$ .

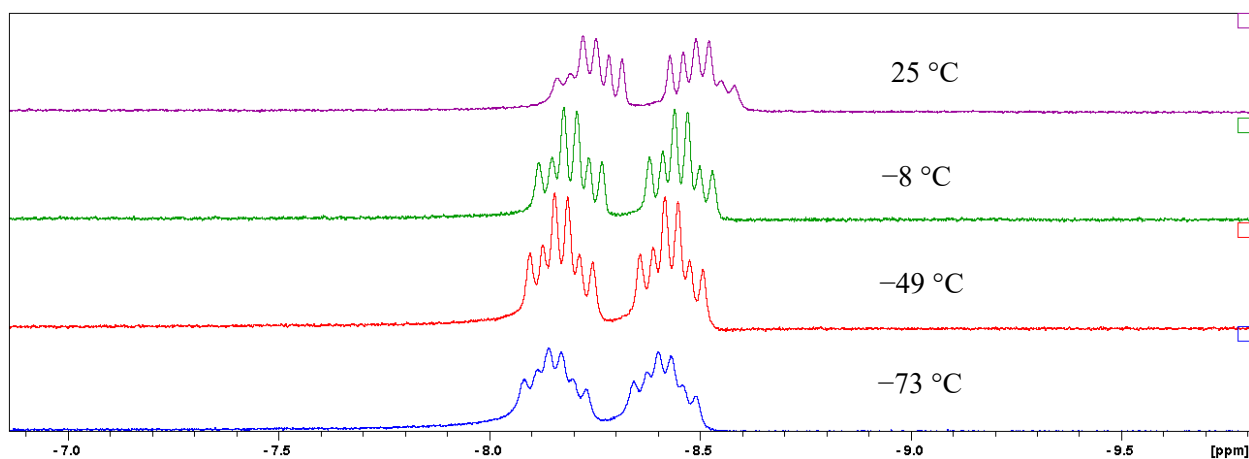

**Figure S36.** Low temperature VT  $^1\text{H}\{^{31}\text{P}\}$  NMR spectrum of **1-H** (400 MHz) in  $\text{CD}_2\text{Cl}_2$  in hydride region. In order from bottom to top:  $-73^\circ\text{C}$ ,  $-49^\circ\text{C}$ ,  $-8^\circ\text{C}$  and  $25^\circ\text{C}$ .

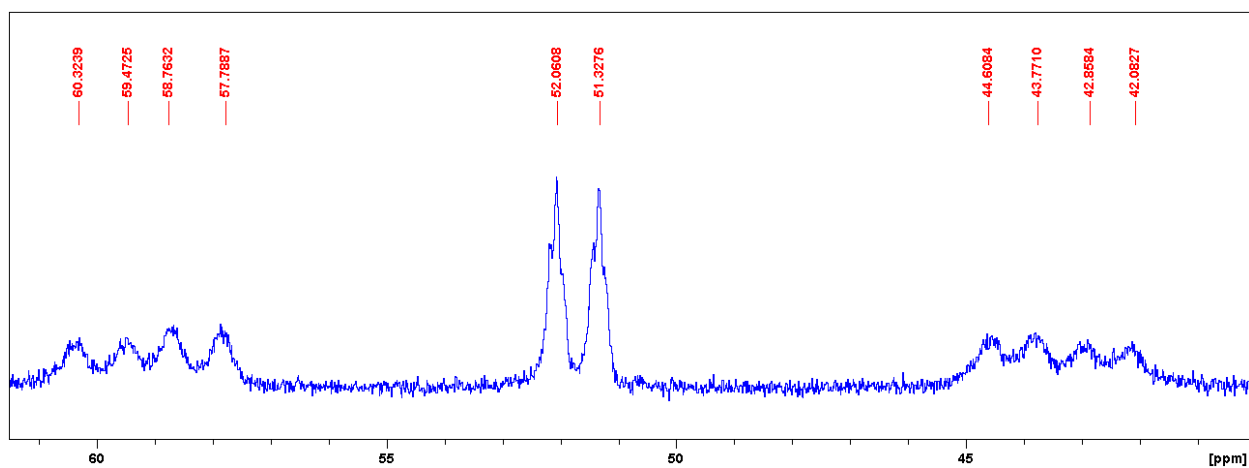

**Figure S37.**  $^{31}\text{P}\{^1\text{H}\}$  NMR spectrum of **1-H** (162 MHz) in  $\text{CD}_2\text{Cl}_2$  at  $-73^\circ\text{C}$ .

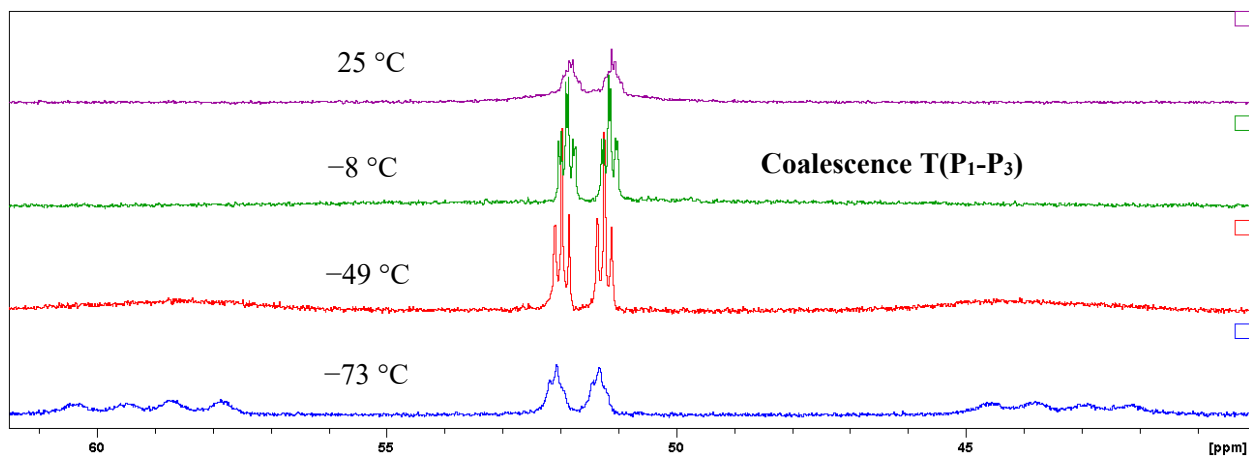

Figure S38. VT  $^{31}\text{P}\{^1\text{H}\}$  NMR spectra of **1-H** (162 MHz) in  $\text{CD}_2\text{Cl}_2$ .

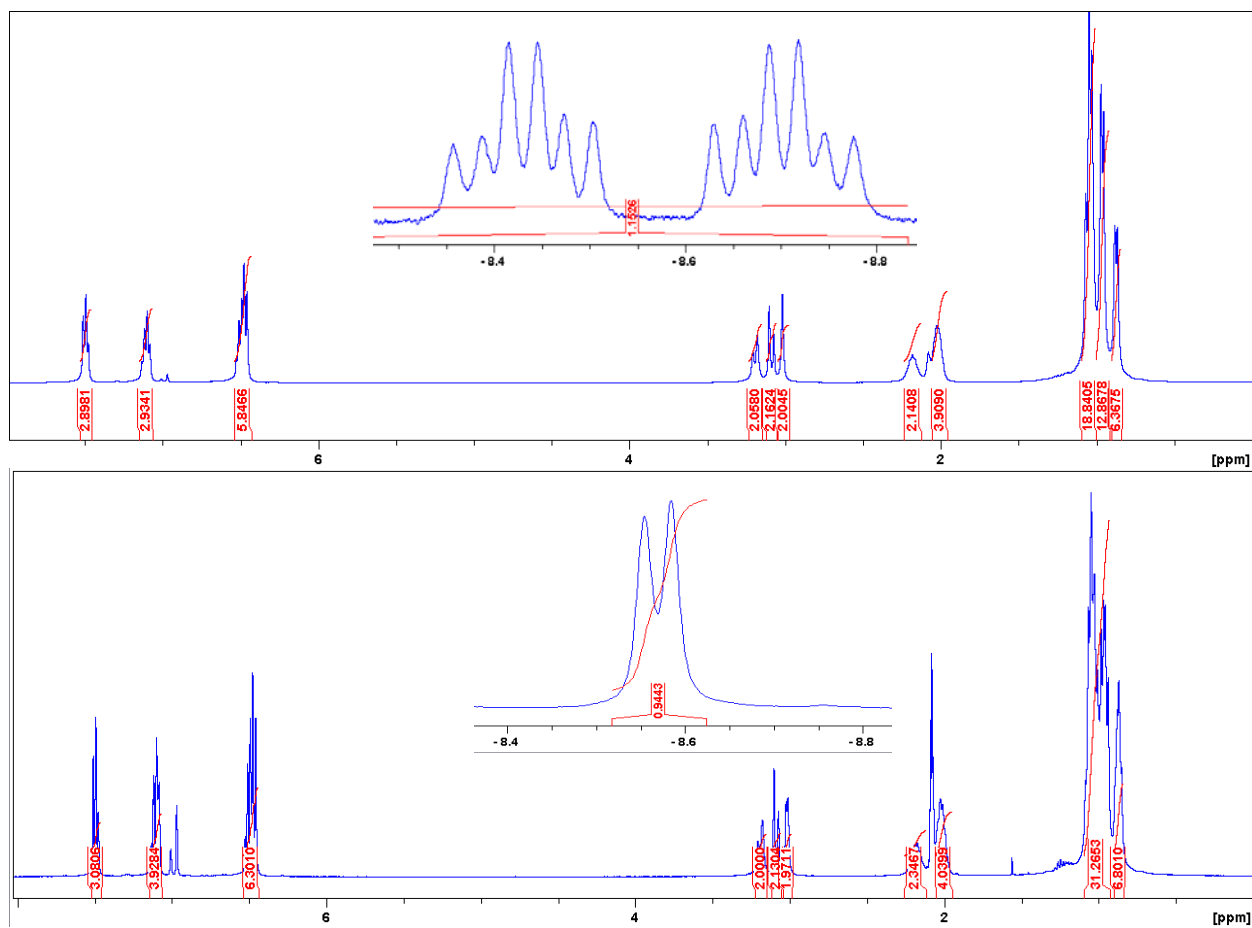

Figure S39.  $^1\text{H}$  (top) and  $^1\text{H}\{^{31}\text{P}\}$  (bottom) NMR spectra of **2-H** (400 MHz) in  $\text{toluene-}d_8$  at  $25^\circ\text{C}$ .

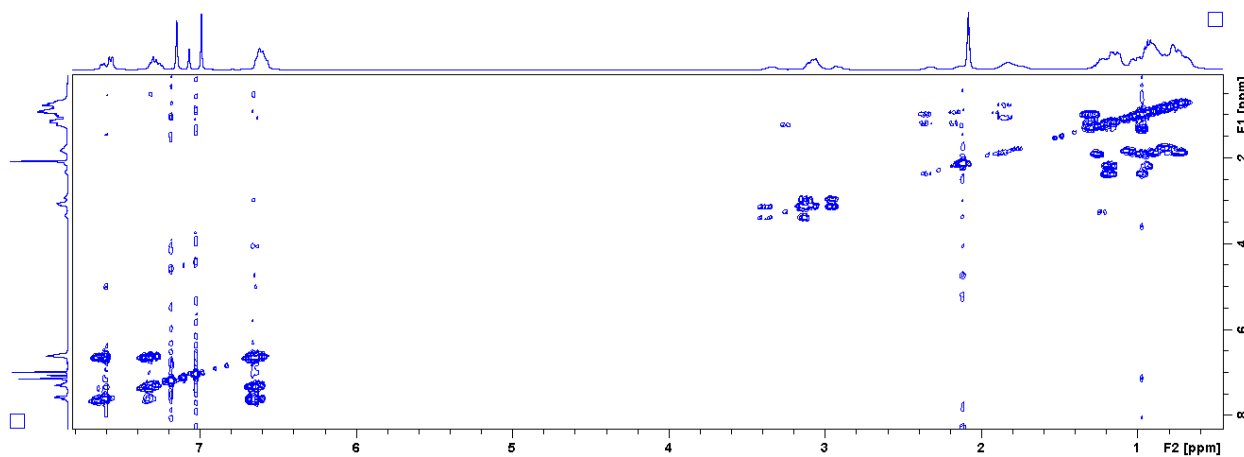

**Figure S40.**  $^1\text{H}$  COSY NMR spectrum of **2-H** (400 MHz) in toluene- $d_8$  at  $-73^\circ\text{C}$ .

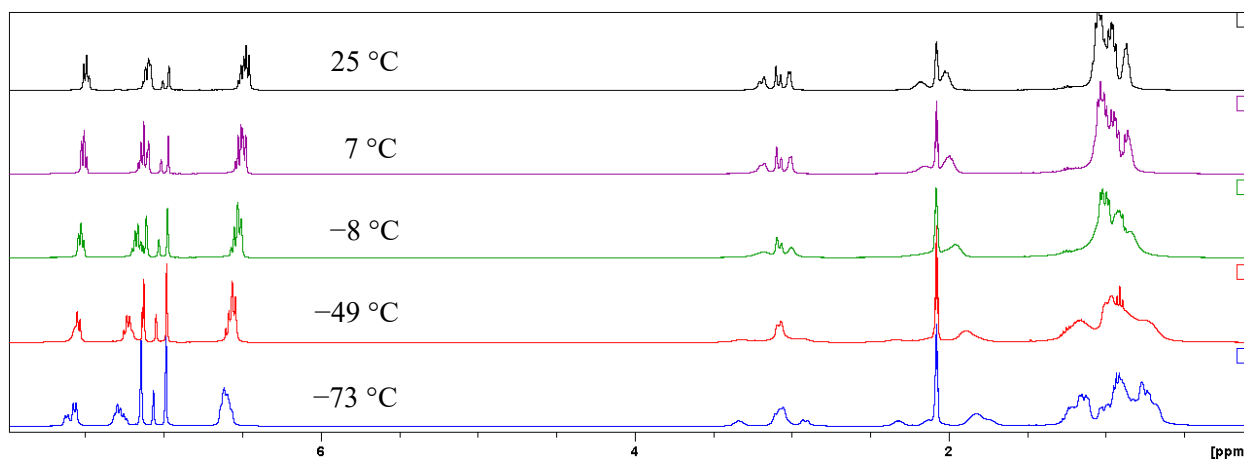

**Figure S41.** Low temperature VT  $^1\text{H}\{^{31}\text{P}\}$  NMR spectrum of **2-H** (400 MHz) in toluene- $d_8$ .

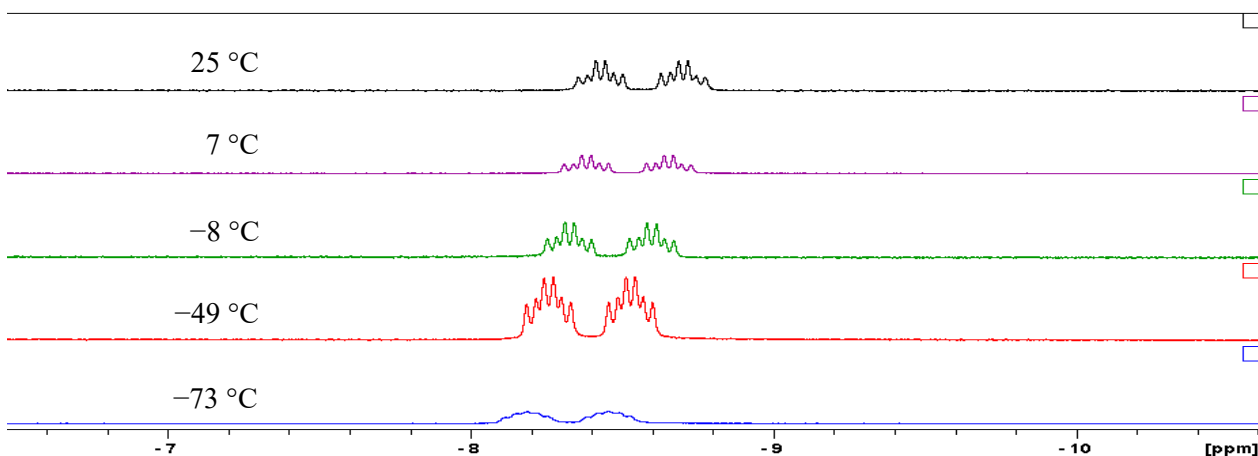

**Figure S42.** Low temperature VT  $^1\text{H}\{^{31}\text{P}\}$  NMR spectrum of **2-H** (400 MHz) in toluene- $d_8$  in hydride region.

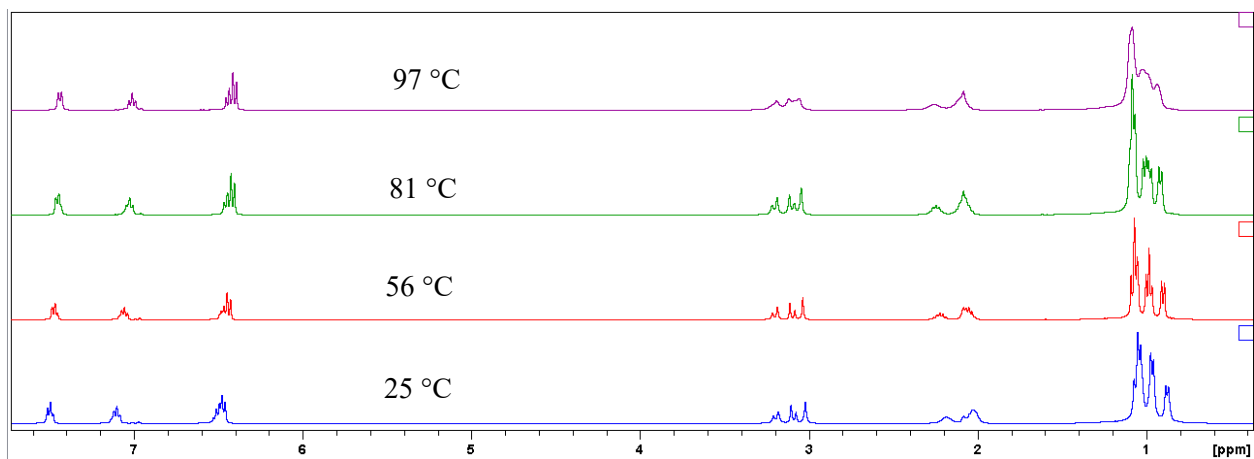

**Figure S43.** High temperature VT  $^1\text{H}\{^{31}\text{P}\}$  NMR spectrum of **2-H** (400 MHz) in  $\text{toluene-}d_8$ .

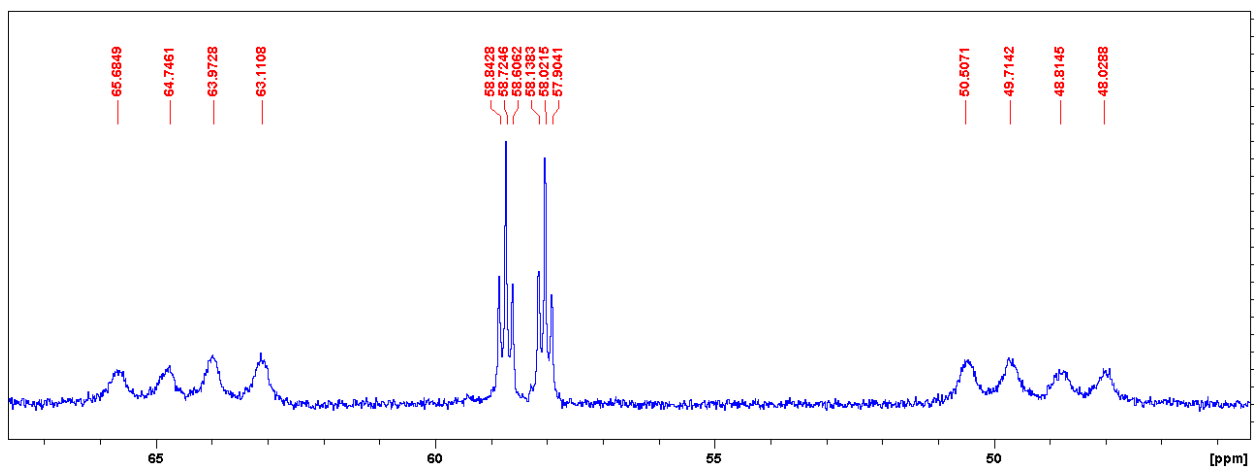

**Figure S44.**  $^{31}\text{P}\{^1\text{H}\}$  NMR spectrum of **2-H** (162 MHz) in  $\text{toluene-}d_8$  at  $-49^\circ\text{C}$ .

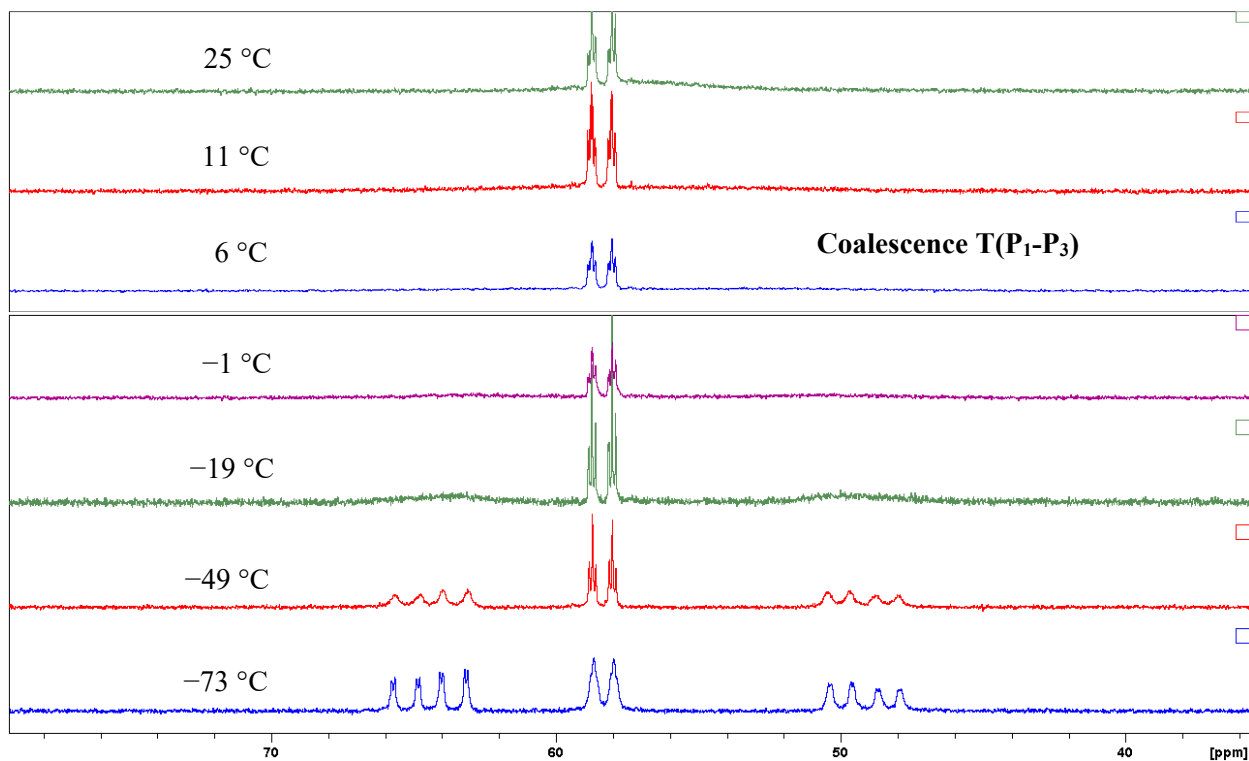

**Figure S45.** Low temperature VT  $^{31}\text{P}\{^1\text{H}\}$  NMR spectra of **2-H** (162 MHz) in toluene- $d_8$ .

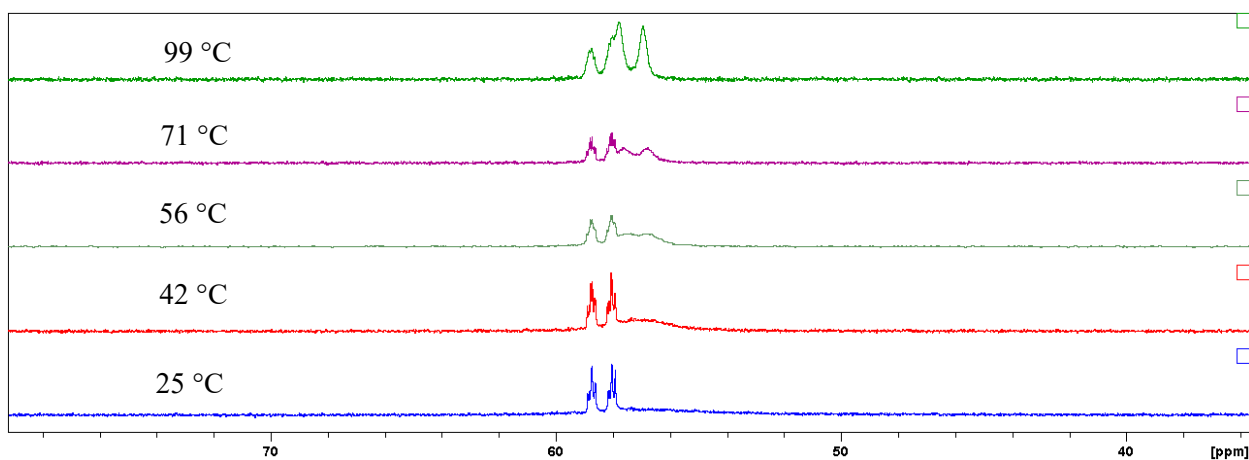

**Figure S46.** High temperature VT  $^{31}\text{P}\{^1\text{H}\}$  NMR spectra of **2-H** (162 MHz) in toluene- $d_8$ . At room temperature, the only visible phosphorus signal corresponds to the phosphine *trans* to the hydride ligand (labeled as  $\text{P}_2$  in main text). The other two phosphorus nuclei are not visible at room temperature because they are near coalescence (labeled as  $\text{P}_1$  and  $\text{P}_3$  in main text). At higher temperatures the two phosphines *cis* to the hydride are equivalent and appear as a doublet, corresponding to both  $\text{P}_{1,3}$ .

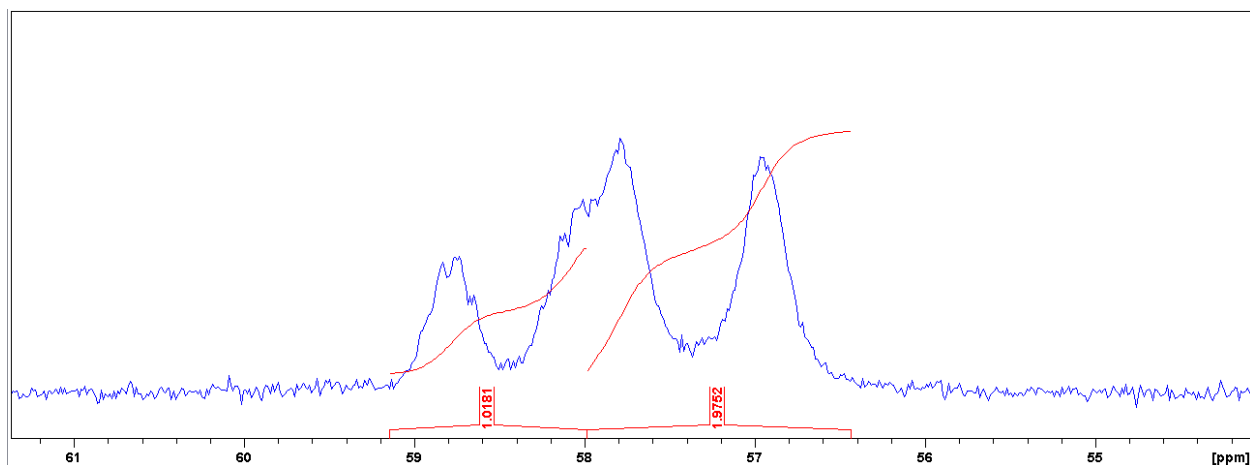

**Figure S47.**  $^{31}\text{P}\{^1\text{H}\}$  NMR spectrum of **2-H** (162 MHz) in toluene- $d_8$  at 97°C.

**Table S1.** Calculation of approximate rate constants and energy barriers for the fluxional processes that equilibrate  $\text{P}_1$  and  $\text{P}_3$  for all complexes.

|                                | <b>1-Cl</b> | <b>2-Cl</b> | <b>1-CH3</b> | <b>2-CH3</b> | <b>1-H</b> | <b>2-H</b> |
|--------------------------------|-------------|-------------|--------------|--------------|------------|------------|
| $T_c$ (K)                      | 359         | 345         | >370         | >370         | 265        | 279        |
| $\Delta$ (Hz)                  | 2905.7      | 3338.9      | 3493.7       | 3749.6       | 2562.8     | 2482.4     |
| $J$ (Hz)                       | 317         | 325         | 314          | 317          | 265        | 273        |
| $k_c$ ( $\text{s}^{-1}$ )      | 6681        | 7625        | 7947         | 8506         | 5873       | 5711       |
| $\Delta G^\ddagger$ (kcal/mol) | 14.9        | 14.2        | >15.2        | >15.2        | 10.9       | 11.5       |

where  $k_c = (\pi/\sqrt{2}) \times (\sqrt{\Delta\nu^2 + 6J^2})^{-1}$  for a coupled system and Eyring relationship,  $\Delta G^\ddagger = RT_c[23.76 + \ln(T_c/k_c)]$ .

## References

1. D. Kost; E. H. Carlson; M. Raban. *J. Chem. Soc. D*, **1971**, 13, 656.
